# Supplementary material for: P2RY14 Is a Potential Biomarker of Tumor Microenvironment Immunomodulation and Favorable Prognosis in Patients With Head and Neck Cancer
Source: Front Genet. 2021 Jul 8;12:670746. doi: 10.3389/fgene.2021.670746 (PMC8297391; doi:10.3389/fgene.2021.670746)
Supplement: Supplementary Table 2 — Differential gene expression based on immune scores. [file Table_2.XLSX]

## Sheet: Stromal.Diff
gene	conMean	treatMean	logFC	pValue	fdr
AOC3	0.849287	2.4785	1.54514	1.92194e-44	2.05094e-42
EMILIN1	6.55702	26.7744	2.02974	7.96475e-57	5.60957e-54
COL6A3	15.742	74.8559	2.24949	4.14295e-59	4.86313e-56
PCDHGA12	0.148209	0.396231	1.41871	1.3994e-43	1.36081e-41
NTRK1	0.150299	0.367088	1.28829	3.04652e-14	2.79747e-13
MYOM2	0.578741	1.68681	1.54331	7.92764e-05	0.000200123
PLPP7	0.615037	2.0248	1.71903	2.5343e-38	1.50625e-36
P2RY12	0.131936	0.302728	1.19818	8.39193e-17	9.3742e-16
HSPB3	4.23369	13.0258	1.62138	2.33059e-09	1.24776e-08
SORBS1	0.563825	1.42692	1.33959	1.71357e-23	3.09452e-22
FHL1	7.91424	26.1856	1.72625	6.15426e-14	5.52863e-13
CTGF	32.8075	108.776	1.72926	3.7693e-38	2.18495e-36
VIM	76.0215	169.35	1.15553	1.1038e-45	1.30656e-43
DUOXA2	3.43447	1.66527	-1.04433	9.24824e-05	0.000230813
LAMA4	3.30357	9.83983	1.57461	1.00944e-58	1.01564e-55
LGR5	0.796848	2.09635	1.3955	1.41079e-14	1.3266e-13
CLSTN2	0.308598	1.07002	1.79384	5.82739e-32	2.047e-30
MYH11	1.82379	3.64785	1.0001	3.0319e-14	2.78587e-13
CLEC3B	1.56599	3.16294	1.01419	3.87866e-21	6.01705e-20
ADAMDEC1	1.85624	5.19811	1.4856	3.69328e-20	5.30311e-19
RELN	0.0873935	0.238836	1.45042	2.52966e-15	2.52715e-14
F13A1	2.96841	16.1253	2.44157	4.16737e-49	7.15872e-47
MYF6	1.3714	5.30709	1.95227	2.1644e-10	1.3244e-09
TNN	0.162579	0.715914	2.13865	2.77052e-38	1.63973e-36
GPR34	1.00964	2.61164	1.37112	1.61569e-32	5.92671e-31
NMRK2	0.829894	3.06032	1.88268	2.14064e-10	1.31214e-09
CHRD	0.461508	1.12544	1.28606	1.75075e-45	2.05509e-43
CORIN	0.0924017	0.311214	1.75192	1.43904e-33	5.61503e-32
OLR1	2.13383	4.82697	1.17768	1.8509e-21	2.94596e-20
PTH1R	0.215927	0.717599	1.73263	2.78236e-41	2.18951e-39
ZYG11A	0.699191	0.315686	-1.14719	5.18763e-06	1.62312e-05
GPIHBP1	0.154444	0.406398	1.39581	4.16449e-21	6.41805e-20
SCN1B	0.937402	2.5772	1.45907	7.75997e-31	2.52441e-29
FABP3	4.0052	10.8529	1.43814	6.38223e-19	8.39404e-18
IGFN1	0.197526	0.476098	1.26921	0.00676495	0.0116439
CDH19	0.069539	0.168299	1.27513	8.35117e-13	6.65165e-12
CHSY3	0.635921	1.41769	1.15662	8.52414e-37	4.43067e-35
COL1A1	197.187	1061.85	2.42894	2.80391e-56	1.79527e-53
ATP10A	0.394062	1.25219	1.66796	7.09816e-55	3.44775e-52
CSF1R	5.60393	14.8903	1.40986	9.38227e-38	5.32898e-36
WIF1	2.31198	4.90478	1.08506	0.0108283	0.0178792
DTNA	0.28721	0.589863	1.03827	3.06035e-13	2.56595e-12
SNED1	0.265526	0.887416	1.74076	1.66135e-38	9.9582e-37
COL10A1	3.07373	18.373	2.57952	1.0936e-39	7.23212e-38
MYOZ1	2.83411	13.5242	2.25457	4.93601e-11	3.25966e-10
KCNN3	0.312806	0.723119	1.20897	1.42696e-28	3.88786e-27
CILP2	0.634433	1.39554	1.13728	3.00666e-09	1.57852e-08
HTR2B	0.101276	0.207217	1.03286	5.37405e-15	5.16364e-14
KLHL38	0.144324	0.352573	1.28861	1.86409e-12	1.42704e-11
CASQ2	2.1276	9.36866	2.13862	1.0851e-15	1.11976e-14
CXCL5	2.0755	6.10636	1.55685	0.000205086	0.000479397
ADAMTS14	1.2118	2.92748	1.27251	5.74198e-32	2.02204e-30
SIGLEC9	0.530585	1.2022	1.18002	3.46726e-35	1.54556e-33
CREB3L1	3.01978	8.19386	1.4401	4.4101e-36	2.09867e-34
CCL14	0.0598312	0.1415	1.24183	3.47059e-13	2.87907e-12
NKX3-2	0.189097	0.652968	1.78789	6.98923e-24	1.30662e-22
RAI2	1.07284	2.1894	1.02909	2.32075e-29	6.67146e-28
ADA2	4.28632	9.32846	1.1219	5.18513e-22	8.60279e-21
TM6SF1	0.295795	0.750454	1.34317	2.11098e-37	1.14367e-35
DNAJC5B	0.0842364	0.185096	1.13576	4.33424e-15	4.21922e-14
ISM1	1.06005	2.43304	1.19862	7.93867e-24	1.47331e-22
TCF24	0.199721	0.0944939	-1.07969	0.000151831	0.00036397
SBK2	0.0422245	0.161982	1.93968	2.24301e-08	1.02748e-07
HHIP	0.043644	0.199265	2.19083	1.24373e-16	1.36976e-15
BHMT2	0.138794	0.341621	1.29945	1.07202e-27	2.7606e-26
TTN	0.516383	2.48386	2.26607	1.87994e-09	1.02361e-08
GDF10	0.133518	0.444656	1.73565	6.91654e-18	8.35561e-17
KDR	1.79291	3.9641	1.14469	8.48701e-32	2.94453e-30
JAM3	1.75051	3.82647	1.12824	4.16255e-43	3.88303e-41
POSTN	22.2301	128.533	2.53155	2.74059e-51	6.65585e-49
PRND	0.0865933	0.35047	2.01697	3.32844e-22	5.58149e-21
CCL2	8.00033	16.5153	1.04567	1.7906e-23	3.2295e-22
MAP1A	1.08071	3.10257	1.52148	9.30706e-38	5.30766e-36
ANO5	0.108815	0.432021	1.98922	6.42614e-15	6.15773e-14
MUCL1	6.2784	14.9804	1.2546	0.00395925	0.00713866
OIT3	0.0723872	0.203254	1.48948	3.83434e-21	5.95485e-20
CYBB	4.8631	13.8902	1.51412	1.12952e-32	4.2091e-31
ZEB1	1.08703	3.07245	1.499	3.82782e-53	1.22543e-50
MAJIN	0.203449	0.0856718	-1.24778	0.0279287	0.0419452
ACVRL1	2.12055	4.57109	1.1081	2.28295e-54	9.18789e-52
FPR3	4.01018	11.4814	1.51756	3.05374e-38	1.79229e-36
COL26A1	0.279575	0.938302	1.74682	1.4587e-06	4.99446e-06
PCOLCE	8.85505	33.145	1.90422	2.3936e-56	1.60553e-53
KRT32	0.384356	0.191997	-1.00136	0.000188307	0.000444453
EXOC3L4	1.38112	0.660382	-1.06447	0.00278915	0.00519134
MMP9	54.0344	114.962	1.08921	3.32296e-21	5.18352e-20
PTGER2	0.354198	0.948413	1.42096	2.74673e-34	1.14469e-32
C7	0.489021	1.00088	1.0333	2.11089e-12	1.60551e-11
MEOX2	0.254006	0.954175	1.90939	5.73246e-35	2.52536e-33
ASB12	0.117326	0.309087	1.39749	0.033852	0.0498786
LUM	67.3514	194.655	1.53114	8.91816e-46	1.06459e-43
AEBP1	32.302	124.363	1.94486	2.62806e-54	1.00051e-51
CTSK	22.3359	90.6798	2.02141	4.40037e-62	1.03306e-58
DCLK3	0.109925	0.227854	1.05159	2.2721e-26	5.2467e-25
CAV3	0.367389	1.3796	1.90888	2.98519e-09	1.569e-08
C3AR1	2.93057	7.31251	1.31919	4.1986e-34	1.71424e-32
PDE1B	0.149768	0.31711	1.08225	2.60204e-36	1.27265e-34
CCR2	0.318519	0.958778	1.58982	1.39885e-26	3.30608e-25
C4A	0.203473	0.526282	1.371	2.50295e-22	4.22741e-21
FNDC1	1.62724	10.585	2.70152	2.08479e-51	5.24399e-49
ABRA	0.0926804	0.334488	1.85162	2.00141e-06	6.72036e-06
TMEM130	0.0940771	0.29813	1.66403	3.06195e-28	8.07691e-27
SPON1	1.88725	7.23353	1.93842	3.39915e-45	3.86133e-43
CDKN2A	16.2778	7.73281	-1.07385	0.0040465	0.0072805
ADAMTS8	0.062608	0.168111	1.425	1.18991e-16	1.31151e-15
CGB8	0.225933	0.466317	1.04542	0.0158197	0.0251821
HK3	1.10002	3.06508	1.4784	1.24313e-23	2.28301e-22
OLFML1	0.764067	2.87379	1.91119	3.33645e-63	1.95249e-59
C9orf24	0.343911	0.16672	-1.04461	0.000886414	0.00183367
ADRA2A	0.670088	2.49223	1.89502	2.90871e-38	1.71431e-36
COL6A6	0.101318	0.268774	1.4075	7.09155e-20	9.97918e-19
PLPPR3	0.0541137	0.169781	1.64961	5.55302e-11	3.64491e-10
PRUNE2	0.401178	1.88397	2.23146	1.09861e-26	2.61846e-25
MRC2	14.7416	31.5021	1.09556	4.56358e-29	1.28053e-27
GPR183	4.63718	9.74256	1.07105	7.71352e-28	2.00466e-26
IQGAP2	0.775046	1.66181	1.1004	5.12955e-27	1.25661e-25
LIMCH1	1.75495	3.61257	1.04159	1.48085e-11	1.02856e-10
KLHL30	0.429958	1.3579	1.65911	3.34319e-09	1.74029e-08
NMU	14.8786	6.58241	-1.17655	1.55071e-09	8.55259e-09
HTR1B	0.0647692	0.191562	1.56443	1.90946e-28	5.14276e-27
ZEB2	0.555893	1.71897	1.62867	1.97846e-61	3.12868e-58
GSTA3	0.446754	0.148183	-1.5921	0.0206346	0.0319897
CD80	0.324868	0.70523	1.11824	2.8116e-23	5.0387e-22
VCAN	3.80963	19.4496	2.35202	5.50191e-59	5.96153e-56
CDH15	0.202116	0.683049	1.7568	6.34633e-19	8.35462e-18
MYOM3	1.49638	3.46078	1.20962	1.1642e-09	6.53865e-09
NKX2-2	0.385268	0.163524	-1.23636	0.0309801	0.0459741
MRGPRF	1.37241	3.636	1.40564	1.44667e-42	1.28162e-40
CCKAR	0.0814537	0.363261	2.15695	2.98426e-16	3.20154e-15
SP9	0.416215	0.188265	-1.14456	0.00203687	0.00390199
ZNF469	0.86881	3.11683	1.84297	4.87404e-49	8.27178e-47
FN1	59.4435	237.443	1.99799	1.69378e-51	4.33793e-49
DDIT4L	0.790476	3.52187	2.15555	1.46352e-16	1.60305e-15
CCR4	0.597787	1.42171	1.24992	6.91214e-23	1.20352e-21
DIRC1	0.0577794	0.284401	2.2993	7.66734e-41	5.62511e-39
SIGLEC6	0.0828791	0.189838	1.19568	1.94087e-17	2.27447e-16
FCAR	0.0893798	0.276232	1.62786	8.53254e-13	6.79036e-12
GJA5	0.817551	2.10891	1.36712	7.99573e-29	2.21708e-27
CX3CR1	0.314308	0.650772	1.04997	3.46285e-18	4.28251e-17
CAMK2A	0.278735	0.714584	1.35821	7.99658e-15	7.61594e-14
RGS18	0.323139	0.756908	1.22796	9.15486e-26	1.98393e-24
PLA2G2A	1.69273	16.4245	3.27842	8.77601e-13	6.97623e-12
MAMDC2	0.875241	1.82349	1.05895	7.80003e-16	8.15068e-15
CLEC10A	1.13253	2.41469	1.09228	9.36774e-16	9.73112e-15
SDC2	5.1797	14.8159	1.51621	7.41392e-39	4.58037e-37
CCL24	2.1607	5.34508	1.30672	7.20224e-13	5.78397e-12
LILRA1	0.146907	0.327332	1.15585	2.54681e-20	3.70221e-19
PTGFR	0.193415	0.775234	2.00293	8.00122e-32	2.78973e-30
CHN1	1.72181	3.84064	1.15742	5.688e-41	4.23922e-39
SGCA	0.688136	2.80606	2.02778	3.14256e-14	2.88378e-13
TLR4	0.843167	2.54356	1.59296	9.95571e-45	1.0705e-42
STAC2	0.128788	0.779214	2.59702	3.27541e-08	1.46143e-07
THBS4	3.43039	20.081	2.54939	1.1515e-26	2.73988e-25
SLITRK4	0.113083	0.254198	1.16857	9.86848e-24	1.82664e-22
KCND2	0.109523	0.403746	1.88221	6.89539e-41	5.08526e-39
PMP22	9.92937	24.4916	1.30251	1.89731e-57	1.57209e-54
HMSD	0.671915	0.280771	-1.25888	0.000861102	0.00178691
FOXJ1	1.6106	0.727694	-1.14619	0.030606	0.045534
GREM2	0.0847657	0.307713	1.86003	9.8857e-28	2.55505e-26
PCDH10	0.0707774	0.245551	1.79466	9.41554e-09	4.58125e-08
MYLPF	7.35007	25.8677	1.81532	2.53361e-09	1.34629e-08
SLC2A10	1.38577	2.78147	1.00516	8.79975e-27	2.10805e-25
RFLNA	0.618178	1.54335	1.31998	4.49568e-41	3.38643e-39
LILRA4	0.264261	0.70095	1.40735	2.27286e-13	1.93097e-12
MME	1.86016	4.18956	1.17138	1.98953e-36	9.86777e-35
ADGRF1	1.45473	0.677349	-1.10278	2.69825e-08	1.22014e-07
HSPA12B	0.91014	2.19228	1.26827	8.11914e-47	1.0892e-44
HAS1	0.482002	1.35571	1.49193	5.31708e-08	2.28761e-07
CYS1	0.638837	1.96942	1.62425	1.65877e-36	8.34482e-35
BRINP1	0.101058	0.223997	1.1483	1.07904e-13	9.49368e-13
ARHGAP6	0.110127	0.270383	1.29583	1.47705e-41	1.18215e-39
NEB	1.31192	7.22327	2.46098	5.10403e-11	3.36117e-10
SCGB1A1	4.60665	1.7762	-1.37492	0.0269071	0.0405405
CCL23	0.176835	0.407379	1.20397	9.39023e-17	1.04479e-15
TNS3	4.55692	9.62862	1.07927	1.50745e-37	8.29452e-36
CD180	0.462268	0.929764	1.00814	8.4702e-21	1.27879e-19
ACTG2	1.15672	4.04178	1.80495	1.60489e-22	2.74018e-21
AKAP6	0.334534	0.908306	1.44103	1.77461e-09	9.70765e-09
LYVE1	0.698136	1.68969	1.27518	3.23296e-29	9.16288e-28
CARNS1	0.233674	0.491034	1.07132	3.80542e-07	1.42942e-06
VSIG4	2.62027	8.15354	1.63771	2.99174e-35	1.34638e-33
SELL	3.07784	6.16377	1.00189	5.54733e-19	7.3233e-18
GPR141	0.172847	0.408228	1.23988	1.88968e-25	4.00271e-24
LDB3	0.671391	3.2666	2.28256	1.44559e-14	1.35842e-13
ANXA6	9.58329	21.2575	1.14938	8.86233e-49	1.43488e-46
FAM19A5	0.927397	2.09937	1.17869	2.74273e-31	9.11182e-30
CPZ	0.127178	0.393486	1.62946	1.63009e-35	7.57802e-34
NCKAP1L	1.4733	3.35042	1.18529	2.58603e-27	6.47012e-26
SGCD	0.356544	2.08688	2.54919	2.39539e-49	4.32583e-47
COL12A1	17.6516	48.5156	1.45865	3.12887e-38	1.82121e-36
SYNE1	0.296004	0.855969	1.53194	2.03701e-42	1.76033e-40
BST1	0.434223	1.06719	1.29731	1.60937e-49	3.06347e-47
APLNR	2.24237	6.15971	1.45784	1.38273e-36	7.08258e-35
PLXDC2	3.66332	7.62578	1.05773	3.4632e-27	8.61883e-26
CD93	4.55952	11.6745	1.3564	4.69732e-46	5.7536e-44
KCNJ8	1.31225	3.30073	1.33074	3.28695e-46	4.06141e-44
HEYL	2.06943	4.80877	1.21644	1.2276e-39	8.08037e-38
EPDR1	1.28851	3.45911	1.4247	8.25668e-40	5.56476e-38
THPO	0.0901845	0.208636	1.21004	1.88064e-30	5.92633e-29
FZD4	1.03857	2.09506	1.01239	1.1907e-33	4.68496e-32
CXorf36	0.848684	1.77214	1.0622	2.39693e-40	1.66321e-38
SIGLEC12	0.637007	1.44798	1.18466	1.76934e-08	8.23625e-08
EDA2R	0.204602	0.476069	1.21835	1.99633e-35	9.21977e-34
SMOC2	2.05653	4.80357	1.22389	1.73325e-26	4.06233e-25
CCDC187	0.270531	0.0949546	-1.51048	1.63968e-06	5.57619e-06
PDZRN4	0.0778575	0.233408	1.58394	1.01958e-29	3.02991e-28
CSDC2	0.230676	0.731736	1.66546	9.52855e-21	1.43094e-19
CES5A	0.0751864	0.237546	1.65966	0.000171414	0.000407035
KLHL4	0.143748	0.301491	1.06857	6.12866e-21	9.35301e-20
KLHL33	0.0316515	0.135263	2.09542	5.70633e-17	6.4355e-16
HNMT	0.855851	2.10096	1.29562	2.09005e-45	2.43309e-43
ITM2A	2.73065	5.66239	1.05217	3.45368e-25	7.1753e-24
SHISA8	0.273707	0.114034	-1.26317	0.00578811	0.0100943
HSD11B1	0.653644	1.76906	1.4364	9.03443e-31	2.91878e-29
TGFB3	4.27614	13.3161	1.63879	9.5674e-51	2.10573e-48
AKR7A3	0.701394	0.340448	-1.04279	7.79362e-08	3.26437e-07
TMEM200A	0.62192	1.38026	1.15014	2.11204e-32	7.66757e-31
SPTB	0.428289	1.68927	1.97975	5.74246e-09	2.88166e-08
LOXL2	10.2244	22.8139	1.1579	8.8052e-32	3.04742e-30
MLIP	0.374072	0.774464	1.04988	0.00169376	0.0032999
SLC18A2	0.121284	0.26018	1.10112	1.33567e-16	1.46655e-15
IGF2	6.36516	20.1536	1.66277	5.82814e-34	2.3523e-32
FBLN2	14.0409	39.2337	1.48245	1.17533e-41	9.56975e-40
CPXM1	4.87338	18.4786	1.92287	6.80753e-48	9.78479e-46
FOXH1	0.277267	0.111633	-1.31251	5.35053e-06	1.6689e-05
SLC24A2	0.0848239	0.254371	1.58439	1.71222e-29	4.98314e-28
IGSF21	0.317694	0.70639	1.15283	1.40346e-24	2.76491e-23
CHRNA1	1.18706	5.24148	2.14258	1.2193e-20	1.81362e-19
GRIA3	0.164255	0.454371	1.46793	1.57409e-21	2.5139e-20
LILRB4	1.5731	4.27922	1.44374	1.45627e-26	3.43026e-25
CERCAM	9.1762	18.512	1.01249	3.44609e-26	7.82929e-25
TCEAL5	0.0573455	0.205485	1.84128	2.4359e-11	1.65439e-10
MYH6	0.116612	0.542163	2.21701	5.01434e-08	2.16463e-07
IL17D	0.165387	0.337331	1.02832	1.54439e-10	9.61302e-10
MYL4	0.447649	1.93388	2.11106	2.01527e-13	1.72252e-12
PRRX1	5.78788	15.6071	1.4311	3.6413e-50	7.22413e-48
ENPEP	0.649064	1.49816	1.20676	1.24958e-38	7.58691e-37
RUNX1T1	0.0791092	0.283711	1.84251	3.00599e-46	3.78057e-44
MITF	0.518666	1.19248	1.20109	2.5611e-35	1.16749e-33
SCN5A	0.139299	0.385104	1.46706	1.6418e-10	1.01924e-09
TNNI2	17.3574	57.5191	1.7285	2.28558e-05	6.35504e-05
DNASE2B	0.0458856	0.184093	2.00432	9.32277e-13	7.38585e-12
LBX1	0.0537339	0.126091	1.23057	2.08047e-05	5.8169e-05
ANGPTL1	0.162848	0.778246	2.2567	9.97761e-32	3.42792e-30
FILIP1L	3.1967	7.8294	1.29232	2.4929e-39	1.56764e-37
EVI2B	3.40142	6.83953	1.00776	3.34441e-24	6.38339e-23
GPC6	0.65626	2.93788	2.16244	2.49112e-47	3.44019e-45
ADGRA2	1.80379	5.57621	1.62826	4.08943e-52	1.17559e-49
C11orf16	0.37261	0.086358	-2.10927	0.00194272	0.00374403
SSC5D	0.62744	2.38137	1.92424	6.47033e-45	7.0652e-43
PGM5	0.197625	0.638837	1.69268	1.85318e-26	4.33618e-25
SYPL2	0.31712	1.32704	2.06511	4.39363e-20	6.27675e-19
MYO18B	0.398083	1.44864	1.86356	1.3283e-09	7.39252e-09
KRT19	513.141	251.92	-1.02639	0.001179	0.00237861
SIRPB2	0.336785	0.683966	1.02209	2.00798e-26	4.6674e-25
C2orf40	0.186186	0.565773	1.60348	1.25241e-10	7.89326e-10
C10orf71	0.258849	1.62179	2.6474	8.02289e-13	6.41376e-12
C6orf58	1.03704	4.77631	2.20343	0.0311964	0.0462561
TMEM100	0.113148	0.274441	1.27829	9.86518e-23	1.70087e-21
ABI3BP	0.528933	1.66069	1.65063	9.74047e-28	2.52214e-26
GPR174	0.293203	0.588118	1.00421	9.87535e-13	7.80169e-12
OLFML2B	5.94916	24.9496	2.06826	1.54892e-67	2.1818e-63
GPR84	0.577127	1.16568	1.01421	4.06593e-22	6.78586e-21
TMEM47	1.38581	3.28629	1.24573	8.7981e-43	7.89363e-41
WISP2	0.299485	1.67154	2.48062	2.38627e-28	6.3661e-27
ISLR	12.6076	49.9579	1.98641	5.19145e-45	5.80371e-43
DDN	1.31386	4.55416	1.79337	0.000120533	0.000294047
CD300E	0.671596	1.41131	1.07136	3.06035e-13	2.56595e-12
TNFAIP6	2.90363	12.1151	2.06087	3.93688e-52	1.15531e-49
ST8SIA2	0.271235	0.578484	1.09273	2.30819e-24	4.44777e-23
PHKG1	0.406284	1.14061	1.48925	3.88931e-08	1.70882e-07
PEBP4	0.161923	0.68807	2.08725	3.51111e-14	3.21361e-13
CCR1	1.83299	4.69997	1.35845	3.39634e-29	9.58735e-28
ZCCHC24	2.09196	5.45055	1.38155	1.09302e-55	5.92165e-53
HRH2	0.406955	0.992513	1.28622	5.11114e-30	1.57539e-28
TMOD1	0.894841	2.40229	1.42471	6.84566e-07	2.47378e-06
SMYD1	0.32658	1.86845	2.51633	4.06067e-12	2.99469e-11
FSTL1	17.6127	50.877	1.5304	9.11868e-54	3.21114e-51
RASGRP4	0.23482	0.528391	1.17005	1.28381e-37	7.14772e-36
BMP5	0.0806101	0.163941	1.02415	1.84538e-17	2.16616e-16
SCN4A	0.141683	0.740558	2.38594	1.87016e-12	1.43091e-11
SFRP2	31.0152	173.685	2.48543	1.06904e-54	4.79836e-52
UGT1A8	0.608526	0.277928	-1.13061	0.0226639	0.0347874
PDGFRL	1.21708	5.52013	2.18128	4.31704e-48	6.33435e-46
S1PR3	1.24839	2.57973	1.04715	3.16993e-28	8.34609e-27
FAM189A1	0.0874549	0.198292	1.18101	1.07406e-22	1.84279e-21
SPARC	138.664	506.885	1.87007	1.09007e-54	4.79836e-52
UNC5C	0.107973	0.338771	1.64964	5.61404e-46	6.81719e-44
LYPD2	31.9337	11.7651	-1.44056	0.000317853	0.000719089
ACHE	0.907672	2.06594	1.18655	4.24768e-08	1.85355e-07
RBFOX1	0.0492843	0.241891	2.29516	1.36847e-10	8.58247e-10
CALD1	15.4867	33.377	1.10783	2.58781e-44	2.68028e-42
MYH1	3.15688	15.7661	2.32026	1.55429e-10	9.67038e-10
HHIPL1	0.345698	0.883966	1.35448	1.98006e-39	1.26204e-37
MYOZ2	0.727034	3.14202	2.1116	6.80771e-11	4.4313e-10
ADGRD2	0.222675	0.103616	-1.10369	1.08577e-10	6.8955e-10
ST6GALNAC3	0.103028	0.219077	1.0884	6.78686e-34	2.7159e-32
ITGA11	0.76776	4.42877	2.52818	2.35153e-49	4.30177e-47
C1QC	57.2206	125.171	1.12929	9.87605e-26	2.13365e-24
OGN	0.201235	1.77385	3.13994	8.17032e-38	4.67834e-36
SULF1	7.12231	25.6574	1.84896	2.72687e-47	3.7292e-45
CACNG1	0.844702	3.17351	1.90957	5.69157e-09	2.85816e-08
ARHGAP31	1.50345	3.30943	1.13831	1.50875e-39	9.83902e-38
PDE3A	0.361572	1.09161	1.59409	1.61697e-42	1.4147e-40
RASL12	0.982204	2.11641	1.10753	1.11987e-37	6.30977e-36
LHX8	0.167928	0.589863	1.81253	3.85519e-27	9.5606e-26
P2RY13	0.65344	1.47117	1.17084	2.43557e-18	3.04955e-17
TRIM63	0.970061	3.1485	1.69852	1.07587e-11	7.56978e-11
HES5	1.06017	0.501593	-1.07971	1.95072e-07	7.71417e-07
SLC2A4	0.354452	0.716763	1.01591	0.00014495	0.000349139
ANKRD1	4.23073	12.1	1.51603	2.51711e-12	1.90317e-11
HTRA3	11.4823	30.5397	1.41127	1.70087e-34	7.23819e-33
ATP2A1	1.64501	9.12802	2.4722	0.000597693	0.00128008
ZNF366	0.231275	0.594953	1.36317	2.54108e-25	5.34234e-24
DUSP13	0.579684	1.70144	1.55341	1.66683e-05	4.74071e-05
LRRC2	0.125327	0.561214	2.16286	1.28042e-15	1.31075e-14
TMEM59L	0.202139	0.458168	1.18053	7.42244e-19	9.70011e-18
ABCA6	0.0863332	0.245393	1.50711	1.76447e-39	1.14011e-37
RIPOR2	0.544242	1.09601	1.00994	2.46638e-21	3.87307e-20
SLC7A7	1.73256	3.987	1.20239	2.18121e-33	8.39468e-32
PROK2	0.180614	0.545299	1.59414	0.000277541	0.000633313
HAND2	0.138761	0.37686	1.44142	7.05772e-21	1.07476e-19
ELN	2.98689	8.8991	1.57502	1.06551e-20	1.58992e-19
PTGDR	0.128774	0.291873	1.1805	7.81459e-35	3.39742e-33
LILRB3	0.369627	0.764969	1.04933	1.20333e-25	2.58386e-24
PCDH18	0.669977	1.96565	1.55282	9.62598e-49	1.54081e-46
THSD7A	0.0923502	0.281391	1.60739	6.9601e-35	3.04472e-33
FBLN5	2.11904	6.40902	1.59669	6.95726e-54	2.57895e-51
PRSS35	0.0741738	0.151568	1.03099	4.16153e-17	4.77356e-16
DES	55.9789	216.272	1.94989	1.60653e-12	1.23862e-11
MB	12.5659	57.0538	2.18281	2.2191e-07	8.69976e-07
EBF2	0.0776349	0.296652	1.93399	5.6269e-43	5.18043e-41
UNC45B	0.329637	1.82501	2.46895	3.06542e-12	2.29069e-11
C5AR1	2.95492	7.39992	1.32439	8.12918e-33	3.05353e-31
FBXL7	0.916749	2.44695	1.41639	3.03298e-46	3.78075e-44
HSPB7	3.09561	13.9354	2.17046	1.84251e-17	2.1646e-16
CDH16	2.38317	1.09522	-1.12166	0.00449865	0.00801821
JAML	1.04344	4.55933	2.12747	1.0491e-11	7.39994e-11
TIFAB	0.124943	0.272796	1.12655	1.50846e-13	1.30437e-12
CNTN4	0.107433	0.252231	1.23131	1.23748e-27	3.15885e-26
SSPN	1.5114	3.23154	1.09634	9.36835e-30	2.80175e-28
F2R	8.11494	18.3196	1.17474	8.79719e-41	6.38749e-39
DUSP26	0.845227	3.01894	1.83663	1.08825e-11	7.64544e-11
SFTA2	1.18955	0.346442	-1.77973	0.000663142	0.00140848
NEXN	2.33288	5.63816	1.27311	3.5689e-21	5.54874e-20
TIE1	1.61839	3.68481	1.18703	1.45911e-42	1.28457e-40
AGTR1	0.0316554	0.246166	2.95911	2.71962e-49	4.78857e-47
SEC14L6	0.0529492	0.120574	1.18724	6.3011e-23	1.10532e-21
AK5	0.102826	0.335619	1.70663	3.61449e-33	1.37977e-31
COL6A1	66.9498	230.644	1.78452	4.21339e-53	1.31889e-50
LCP2	2.11966	4.44794	1.06931	3.26745e-26	7.43542e-25
PCDH12	0.877865	1.92474	1.13259	2.41658e-43	2.31565e-41
UCP3	0.30206	0.754026	1.31978	0.00161622	0.00316327
CMA1	0.179755	0.707099	1.97588	2.01056e-18	2.5377e-17
KLHL41	3.61147	20.9363	2.53535	3.52048e-10	2.10416e-09
LOXL1	5.31175	12.5242	1.23746	9.03632e-29	2.48605e-27
MMP2	36.607	135.276	1.88571	2.35044e-54	9.19674e-52
GSTA1	25.2151	9.87196	-1.35288	0.00819992	0.013881
WDFY4	0.47719	1.0708	1.16606	4.21712e-22	7.02155e-21
RSPO3	0.212259	0.672131	1.66292	3.03523e-39	1.90019e-37
MS4A4A	1.79513	4.77699	1.41202	3.91936e-36	1.88423e-34
SMTNL1	0.703513	2.41038	1.77661	0.00739974	0.012633
NHSL2	0.134144	0.403952	1.5904	1.61973e-31	5.45825e-30
A2M	19.7737	52.7165	1.41467	7.63902e-51	1.70799e-48
MFAP4	4.99125	21.413	2.10101	3.95031e-36	1.89266e-34
TRIM54	1.26235	3.52613	1.48198	0.00031138	0.000705161
LRRC39	0.42464	1.27637	1.58773	0.000285337	0.000650261
LCN12	0.233637	0.0663773	-1.81551	7.02991e-06	2.13873e-05
AQP1	13.8234	29.8568	1.11095	2.95392e-34	1.2274e-32
FAP	2.018	6.21326	1.62242	2.33079e-41	1.84447e-39
FGF10	0.0539397	0.250975	2.21813	2.20471e-26	5.10781e-25
SCARA5	0.541886	1.70465	1.65342	8.43004e-26	1.83249e-24
ALPK2	0.292882	0.656806	1.16515	4.00154e-37	2.127e-35
C1QTNF7	0.0358148	0.142818	1.99555	1.45793e-34	6.22317e-33
CYTL1	0.649137	1.45255	1.16199	3.59312e-29	1.01225e-27
FCGR3B	0.45449	1.19659	1.3966	5.57357e-09	2.8019e-08
SLC25A41	0.251317	0.109637	-1.19677	1.51117e-06	5.16533e-06
TMEM273	0.641464	1.30474	1.02433	2.68289e-30	8.43553e-29
MROH2A	0.794352	0.264701	-1.58541	0.00179252	0.00347598
ACKR1	3.18363	6.72726	1.07934	7.90162e-11	5.10561e-10
COL24A1	0.131096	0.44515	1.76367	4.20124e-45	4.7343e-43
ANTXR1	9.6234	24.7879	1.36502	1.94772e-39	1.25277e-37
HRC	1.08221	4.33306	2.0014	6.03848e-15	5.79414e-14
TEK	0.630356	1.64726	1.38583	3.13073e-41	2.44997e-39
HMX2	0.335187	0.103697	-1.69259	2.26319e-05	6.29652e-05
ST6GALNAC5	0.256065	0.567068	1.14701	2.75763e-19	3.72068e-18
ACTA1	47.5534	254.752	2.42147	1.4247e-11	9.91027e-11
NEGR1	0.101251	0.3839	1.92279	8.51697e-42	7.05706e-40
BMP8A	0.319848	0.806663	1.33458	7.58466e-26	1.6564e-24
SH3BGR	1.49793	3.29443	1.13706	4.69012e-07	1.73718e-06
TXLNB	0.45436	1.88159	2.05004	3.03532e-18	3.76701e-17
ENOX1	0.270252	0.578376	1.09771	1.02697e-33	4.06345e-32
AOAH	1.65613	3.38219	1.03014	1.66515e-22	2.83963e-21
CDH2	0.689792	1.78748	1.37369	1.59518e-29	4.66175e-28
PRKAG3	0.190665	0.657024	1.78491	3.76133e-08	1.65776e-07
ASPG	2.22096	1.08025	-1.03982	1.94346e-11	1.33604e-10
CDH11	2.34885	7.62555	1.69889	8.14374e-43	7.35338e-41
ADAMTS7	0.886439	2.25223	1.34526	1.29004e-41	1.03837e-39
ADAMTS2	5.225	21.5768	2.04598	1.19154e-61	2.39771e-58
CD209	0.97382	3.03214	1.63861	2.38733e-31	7.94987e-30
TIMD4	0.110701	0.2334	1.07614	1.37482e-13	1.19394e-12
LAMP5	2.04125	5.81435	1.51016	1.5984e-30	5.05956e-29
PTGIS	0.431994	2.18242	2.33685	1.77865e-33	6.921e-32
MS4A2	0.157471	0.388567	1.30308	6.29429e-16	6.60174e-15
CAMK2B	0.249732	0.55863	1.16151	0.0018988	0.00366893
HSPB6	3.9893	16.6174	2.05848	4.96801e-17	5.67554e-16
DUSP27	0.344085	1.71135	2.3143	2.62402e-12	1.98081e-11
DSEL	0.253684	0.586468	1.20902	2.0007e-29	5.77497e-28
ADAMTS6	0.197185	0.395918	1.00565	1.55937e-23	2.83059e-22
ENO3	2.76704	8.50767	1.62042	4.28104e-07	1.59615e-06
SYNC	0.687829	1.515	1.1392	1.05222e-21	1.70756e-20
ITGA1	1.32019	2.87651	1.12357	1.37021e-47	1.94958e-45
NAP1L3	0.179896	0.698004	1.95607	2.89859e-45	3.34668e-43
ADAMTSL1	0.13966	0.380228	1.44495	7.4881e-38	4.3052e-36
KCNK3	0.0713523	0.199556	1.48376	9.503e-17	1.05651e-15
FGL2	3.31433	8.15787	1.29948	5.27134e-25	1.07925e-23
STAC3	5.7423	20.3177	1.82303	4.71266e-14	4.27172e-13
YBX2	1.29445	0.562478	-1.20247	0.00344426	0.00628069
MXRA5	8.59031	33.9108	1.98096	1.45823e-50	3.02069e-48
C4B	0.240876	0.609714	1.33984	2.9099e-19	3.92238e-18
COX6A2	4.06269	17.0877	2.07245	6.56537e-08	2.778e-07
CCRL2	0.509426	1.04402	1.0352	1.42429e-29	4.17969e-28
GPRIN3	0.406257	0.898537	1.14518	2.22445e-29	6.4077e-28
FNDC5	0.288941	0.987112	1.77244	8.00075e-12	5.7353e-11
C8G	3.77207	0.90203	-2.06411	5.23406e-06	1.6362e-05
LRRC15	2.27196	16.6951	2.87741	8.04262e-54	2.90483e-51
TMEM132C	0.0295262	0.0931632	1.65776	9.91453e-10	5.62222e-09
C1orf105	0.0614487	0.19147	1.63966	7.66056e-06	2.31162e-05
SFRP4	3.13719	25.1994	3.00585	1.73153e-42	1.50558e-40
SELE	1.89668	4.4477	1.22959	1.10753e-15	1.1404e-14
PDLIM3	3.22581	10.3541	1.68247	2.70868e-24	5.21236e-23
VGLL2	0.103782	0.438061	2.07758	1.38032e-12	1.07659e-11
TACR1	0.113895	0.250875	1.13927	4.64292e-07	1.72196e-06
C11orf96	3.44702	7.96767	1.20881	2.14964e-21	3.40223e-20
KLHL31	0.282932	0.721553	1.35065	0.00069027	0.00146257
CMKLR1	1.22102	3.13283	1.35937	3.40161e-36	1.64657e-34
PLEK	4.98572	10.9591	1.13625	9.10372e-23	1.57731e-21
RCAN2	1.09369	3.50284	1.67932	2.55471e-50	5.21532e-48
PDZRN3	1.20036	2.86717	1.25616	1.4426e-46	1.88152e-44
CMYA5	1.1335	5.69126	2.32796	4.45226e-09	2.27804e-08
CRABP1	2.48767	6.16239	1.3087	0.0223871	0.0344037
CADM3	0.442656	1.40302	1.66428	1.47354e-23	2.68515e-22
NNMT	18.8271	44.3668	1.23667	2.42064e-34	1.01178e-32
PCDH17	0.649752	1.45528	1.16333	2.08457e-33	8.04474e-32
SOX11	0.183146	0.57453	1.64939	5.32377e-24	1.00255e-22
HS3ST2	0.245625	0.6131	1.31966	8.94724e-16	9.31492e-15
NXPE2	0.0714611	0.154566	1.113	0.000460117	0.00100718
GAS7	1.78569	3.76695	1.07691	2.86793e-29	8.17766e-28
BICC1	0.750968	2.99429	1.99539	2.69746e-61	3.79965e-58
PKNOX2	0.160513	0.427024	1.41163	2.87296e-18	3.57811e-17
PDE4C	0.186648	0.0876463	-1.09056	0.000827048	0.00172283
FAM3B	4.27591	1.76602	-1.27573	0.0121551	0.019858
S100A1	1.57966	4.53794	1.52242	3.69101e-06	1.1854e-05
SPN	1.13046	2.27326	1.00786	7.31652e-18	8.81612e-17
HEPH	0.869701	2.7101	1.63976	1.79567e-48	2.77461e-46
RECK	0.640879	1.50859	1.23508	2.5233e-43	2.40157e-41
CPA3	3.5029	8.09915	1.20922	9.96662e-18	1.19278e-16
ITGAX	1.89991	3.97449	1.06484	2.05343e-19	2.79465e-18
DYSF	2.46541	6.17765	1.32523	3.73909e-37	1.99503e-35
GREM1	2.28506	8.05034	1.81682	1.02281e-40	7.35066e-39
CCDC80	3.77645	11.2849	1.57929	2.60509e-40	1.79879e-38
TMEM26	0.107217	0.286683	1.41892	4.73895e-42	3.99718e-40
FAM13C	0.133259	0.42405	1.67	1.09923e-33	4.3372e-32
ADAM33	0.339605	0.774019	1.18851	1.23788e-24	2.44554e-23
EMCN	0.516584	1.17338	1.18359	1.44055e-31	4.87778e-30
MYL3	1.16747	5.86688	2.3292	4.81805e-30	1.49158e-28
COL5A2	24.4352	92.2957	1.9173	1.34044e-50	2.81813e-48
COMP	2.57394	14.3281	2.4768	3.06001e-31	1.01181e-29
F10	0.247794	0.543989	1.13444	1.56588e-22	2.67682e-21
COL6A2	78.8679	271.524	1.78357	3.01078e-53	1.00976e-50
RGS4	1.03403	3.29725	1.67299	8.9401e-37	4.62979e-35
GPD1	0.214973	0.607898	1.49967	9.92647e-05	0.00024656
LYZ	71.4355	169.114	1.24328	3.28363e-21	5.12785e-20
FOXE3	0.191339	0.0902464	-1.08419	0.0122255	0.0199662
TLR8	0.361406	1.17192	1.69718	1.9174e-32	6.99703e-31
HMCN2	0.078319	0.163543	1.06223	1.41335e-09	7.84107e-09
FCGR2B	0.450498	0.937408	1.05716	4.3903e-27	1.08115e-25
CHRNG	0.218371	1.15562	2.40381	2.51556e-10	1.52865e-09
NTM	0.76389	2.45788	1.68598	2.46272e-49	4.39112e-47
LY6H	0.149814	0.504527	1.75176	1.42442e-12	1.10792e-11
DLC1	0.918896	2.25181	1.29311	9.27638e-44	9.13756e-42
MPEG1	3.37005	8.70472	1.36903	5.63865e-27	1.37653e-25
PIEZO2	0.207391	0.446126	1.1051	1.49673e-29	4.38315e-28
SCIMP	0.417204	0.85553	1.03607	4.7642e-20	6.76497e-19
TCAP	10.5197	34.1987	1.70085	1.50261e-07	6.04908e-07
CDH6	0.27545	0.568087	1.04432	9.72409e-29	2.67005e-27
IGDCC4	0.183127	0.670325	1.87202	6.3648e-50	1.22815e-47
FOLR2	2.92927	8.90307	1.60376	3.67386e-41	2.82787e-39
ARPP21	0.097444	0.534872	2.45655	7.65335e-11	4.95428e-10
HIC1	0.575933	1.30836	1.18378	9.75458e-42	8.03527e-40
SCT	1.22944	3.7509	1.60924	1.13497e-23	2.09257e-22
STAB1	3.1346	6.81472	1.12037	9.23157e-33	3.4584e-31
PAPPA	0.801738	1.65308	1.04395	3.12305e-19	4.20164e-18
LRRC25	1.42986	3.14711	1.13815	1.15601e-27	2.96065e-26
NTNG2	0.122483	0.251241	1.03649	2.49291e-39	1.56764e-37
PTPRC	3.16119	7.14619	1.17671	2.00479e-23	3.60657e-22
BEST3	0.152707	0.521446	1.77175	7.00421e-13	5.62814e-12
CXorf21	0.609487	1.31568	1.11014	1.09581e-23	2.02302e-22
FBN1	3.63561	16.815	2.20948	7.80805e-57	5.60957e-54
C1QTNF3	0.485321	2.18636	2.17152	8.20313e-17	9.17058e-16
CCL11	1.59311	4.70816	1.56332	7.02074e-22	1.15396e-20
ALPK3	0.793801	2.17111	1.45158	2.33382e-20	3.40313e-19
SYT11	1.31095	3.0832	1.23381	1.27914e-50	2.73001e-48
PXDNL	0.151685	0.339146	1.16083	6.31722e-18	7.65128e-17
PRR32	0.0603988	0.266962	2.14404	9.98641e-09	4.83563e-08
CD84	0.630739	1.8357	1.54121	4.53474e-31	1.4855e-29
ACTN3	0.0795021	0.171472	1.1089	2.42478e-06	8.02902e-06
DWORF	0.476465	2.21695	2.21814	2.71769e-07	1.04886e-06
MNDA	2.43465	5.71152	1.23016	7.09712e-30	2.15453e-28
FAM110B	0.484144	1.0125	1.06441	5.89594e-30	1.80544e-28
MAB21L2	0.117985	0.420792	1.83451	3.44331e-07	1.29999e-06
MRVI1	0.690763	1.50868	1.12702	2.02895e-40	1.41484e-38
SLC8A2	0.367154	0.14114	-1.37926	0.00525266	0.00923938
IGFALS	0.13398	0.0626551	-1.09652	0.0121044	0.0197799
REN	0.176715	0.0599598	-1.55935	2.99554e-05	8.1568e-05
MYL2	12.967	58.2597	2.16766	4.90964e-10	2.87795e-09
FLNC	4.49496	17.7682	1.98292	3.0144e-17	3.48898e-16
PYGM	0.708352	5.15972	2.86475	4.50712e-13	3.69327e-12
PIK3CG	0.408044	1.10711	1.44	2.18145e-27	5.50678e-26
ANKRD34B	0.221312	0.0974486	-1.18337	0.0336016	0.0495459
SRPK3	0.454571	0.956171	1.07276	0.000898461	0.00185704
P2RY10	0.647659	1.32346	1.03101	4.33491e-18	5.31895e-17
ADH1B	0.0746721	0.266701	1.83658	2.80919e-07	1.08183e-06
CSF3R	0.638267	1.37537	1.10759	5.18729e-21	7.94219e-20
THBS1	26.4167	54.1512	1.03554	6.03426e-22	9.98808e-21
KIAA1755	0.278845	0.679968	1.28601	1.52779e-40	1.08143e-38
TFEC	0.251575	0.611681	1.28179	1.09126e-26	2.60533e-25
CD300LB	0.164835	0.429218	1.38069	1.64288e-26	3.85693e-25
CTSS	11.9949	25.2535	1.07407	1.15172e-21	1.86472e-20
NRAP	2.73219	15.8632	2.53756	1.76654e-08	8.22596e-08
BTBD16	0.741126	0.295345	-1.32732	0.00217121	0.00413072
AGBL1	0.0653436	0.33479	2.35714	4.34418e-09	2.22598e-08
COL15A1	5.39311	15.563	1.52893	7.56295e-42	6.30365e-40
SPDYC	1.93628	0.668742	-1.53377	0.00283984	0.00527801
MGP	9.64815	28.3958	1.55735	2.92259e-27	7.29922e-26
SLC8A3	0.0394772	0.146444	1.89125	4.0204e-21	6.20957e-20
LAMA2	0.862106	2.6848	1.63888	1.70728e-39	1.10823e-37
ATP1B4	0.11768	0.603587	2.3587	7.67512e-14	6.85553e-13
ASB15	0.0263933	0.142161	2.42929	1.89047e-06	6.36758e-06
CD14	26.5595	53.3242	1.00557	1.48783e-28	4.03807e-27
ATP6V0D2	0.253454	0.702681	1.47115	1.33579e-16	1.46655e-15
HHATL	0.3223	1.34304	2.05903	1.10525e-08	5.29542e-08
CLEC1A	0.661361	1.35929	1.03935	1.6324e-24	3.18917e-23
LILRA2	0.145869	0.329945	1.17756	5.82164e-26	1.29547e-24
COL8A1	1.69531	7.74206	2.19117	4.28841e-52	1.20813e-49
CYSLTR1	0.22519	0.488019	1.11579	6.87688e-25	1.38383e-23
P2RY14	0.247352	0.563606	1.18812	8.72302e-21	1.31414e-19
COL8A2	5.13217	11.3281	1.14226	1.25099e-23	2.29446e-22
LMOD2	1.20725	6.9159	2.51819	1.14169e-10	7.22777e-10
FGF7	0.229858	0.97769	2.08864	1.33105e-37	7.38157e-36
PPP1R1A	0.142945	0.942592	2.72117	5.78152e-11	3.78681e-10
CNN1	1.55325	5.49576	1.82303	5.08017e-36	2.4094e-34
MMP16	0.170202	0.59889	1.81505	1.50875e-39	9.83902e-38
AOX1	0.416938	1.10653	1.40813	1.5102e-17	1.78762e-16
ABCA8	0.125473	0.446231	1.83041	1.26051e-21	2.03619e-20
LTBP2	11.9774	25.2104	1.07371	5.81238e-30	1.78373e-28
NFATC4	1.367	2.74533	1.00597	5.21636e-32	1.84617e-30
AKAP12	1.22482	3.69297	1.59222	1.98006e-39	1.26204e-37
SHROOM4	0.436036	0.946232	1.11775	2.76283e-31	9.15699e-30
KCNE4	0.732539	2.24262	1.61421	2.23672e-48	3.38779e-46
LGALS4	0.717036	0.275027	-1.38248	1.53149e-05	4.38718e-05
ENPP2	1.36495	3.40161	1.31737	1.79035e-40	1.25467e-38
CD4	6.42292	14.9644	1.22023	1.8617e-31	6.24379e-30
MYL9	23.6935	63.6839	1.42644	3.39972e-40	2.32468e-38
DMRTA2	1.60362	0.648545	-1.30605	0.000190367	0.000448788
TCTEX1D1	0.0969533	0.237088	1.29006	8.45137e-27	2.02804e-25
CACNA1G	0.078052	0.225606	1.5313	5.1794e-23	9.14249e-22
IGF1	0.0753394	0.188585	1.32374	7.33467e-25	1.46801e-23
FLT4	0.687635	1.40611	1.03199	2.25747e-28	6.04539e-27
PRKCB	0.53629	1.07618	1.00484	1.42878e-20	2.10962e-19
DKK2	0.187427	0.62166	1.7298	2.55792e-37	1.37522e-35
PPP1R27	1.51735	5.21258	1.78044	9.58609e-06	2.84188e-05
MMP11	11.78	46.7068	1.98729	6.46892e-30	1.97232e-28
ITGB2	7.91034	18.841	1.25207	2.62944e-28	6.96209e-27
DIRAS1	1.0864	2.27339	1.06529	1.07329e-14	1.01602e-13
MYLK3	0.0399658	0.26581	2.73356	3.5049e-11	2.34203e-10
NCAM1	0.459848	1.72065	1.90372	2.22077e-15	2.22646e-14
ACAN	0.202034	0.573094	1.50417	2.83735e-22	4.77501e-21
CALHM5	0.466396	1.30813	1.48787	9.12584e-47	1.2127e-44
ST6GAL2	0.244041	0.852923	1.80529	6.99484e-30	2.12806e-28
CD163L1	0.478274	1.27986	1.42007	4.15413e-30	1.29458e-28
CACNA1C	0.170489	0.515489	1.59626	1.95455e-49	3.62261e-47
COL14A1	1.65358	6.12923	1.89011	5.77408e-43	5.28141e-41
GPHA2	0.159351	0.0711227	-1.16383	0.00698723	0.0119895
MYBPC2	3.96538	18.3114	2.20721	9.8767e-11	6.30087e-10
FLI1	1.06751	2.17366	1.02588	2.88291e-36	1.4003e-34
ADAMTS12	1.18525	5.28502	2.15671	2.13288e-54	8.83641e-52
DAB2	2.58331	7.8466	1.60285	1.17405e-57	1.03361e-54
DHH	0.0564475	0.16671	1.56236	1.41761e-26	3.34481e-25
CLEC5A	0.724735	1.51915	1.06774	2.01754e-24	3.90909e-23
KCNA3	0.230803	0.547826	1.24705	1.00005e-17	1.19582e-16
GFRA1	0.225902	0.697933	1.62739	7.92932e-25	1.57758e-23
ADAMTS16	0.067819	0.431267	2.66882	1.09116e-38	6.68264e-37
MYOT	1.37977	7.09718	2.36282	2.7238e-09	1.43916e-08
GRP	0.730296	2.78433	1.93078	7.29484e-18	8.79753e-17
COL5A3	8.57881	21.3169	1.31315	3.38747e-35	1.51479e-33
NOX4	0.506811	1.47292	1.53916	2.96233e-49	5.15153e-47
RHOJ	1.11172	2.75054	1.30693	1.21084e-48	1.8951e-46
NDNF	0.134037	0.634605	2.24323	4.52354e-44	4.61729e-42
CLC	0.0870806	0.518788	2.57472	5.86328e-09	2.93915e-08
CCL18	13.7135	37.8664	1.46533	7.64275e-24	1.42214e-22
MYOZ3	0.180308	0.87751	2.28295	5.18017e-15	4.99122e-14
MEDAG	2.31667	6.84733	1.56349	6.28938e-34	2.53121e-32
PLN	0.542026	2.05154	1.92028	2.52567e-29	7.21635e-28
TMEM190	0.391176	0.186104	-1.07171	0.00489423	0.00866082
MYBPH	8.55512	36.683	2.10025	4.38853e-10	2.58648e-09
EBF1	0.566315	1.43564	1.34202	2.26955e-51	5.60859e-49
ECM2	0.740804	2.76588	1.90058	2.02912e-55	1.02079e-52
DHRS7C	0.0968546	0.516499	2.41487	5.58975e-07	2.04832e-06
SERPING1	38.3132	80.6491	1.07382	1.18158e-31	4.04958e-30
PDK4	1.34318	5.03304	1.90577	1.58755e-20	2.33915e-19
BGN	116.095	342.621	1.56131	4.72629e-44	4.78953e-42
DOCK2	0.823959	1.92682	1.22558	3.5408e-28	9.30517e-27
PCP2	0.773659	0.380132	-1.0252	8.40571e-08	3.50106e-07
STOML3	0.125372	0.0377306	-1.73241	0.00113957	0.00230432
CLDN3	6.56219	2.5191	-1.38127	0.00995486	0.0165504
EXTL1	0.0398769	0.17998	2.17421	1.59324e-24	3.12132e-23
CA3	1.14736	3.91783	1.77174	5.9639e-08	2.54723e-07
ITGA9	0.752957	1.51492	1.00861	5.35117e-35	2.37781e-33
MYH7	4.21673	23.9163	2.5038	3.10415e-09	1.62668e-08
IL10	0.281472	0.61816	1.13499	3.11151e-25	6.50277e-24
LAX1	0.636867	1.28574	1.01354	2.48262e-11	1.68531e-10
ZNF385D	0.0674997	0.231398	1.77742	2.71581e-40	1.86609e-38
MXRA8	8.00381	25.7859	1.68782	7.5809e-45	8.21419e-43
TNNC1	13.0508	47.7675	1.87189	1.09521e-07	4.48857e-07
LILRB1	0.665844	1.51303	1.18418	6.99409e-24	1.30662e-22
KISS1	0.336295	1.18966	1.82275	0.0067894	0.0116828
CACNA1S	0.319295	1.89222	2.56712	2.73185e-11	1.84737e-10
PIK3R5	0.708017	1.41975	1.00378	6.26138e-26	1.39113e-24
TIMP2	17.6445	65.7818	1.89847	1.06651e-62	3.75571e-59
PPDPFL	0.0629373	0.408173	2.69719	6.17799e-06	1.89966e-05
TNNT3	16.6489	46.7741	1.49028	4.18654e-06	1.33329e-05
ADGRF5	1.61345	3.59518	1.15592	9.82232e-40	6.52628e-38
S1PR1	2.25089	5.19138	1.20563	3.86411e-41	2.95815e-39
ASB5	0.653166	2.78137	2.09027	2.66996e-10	1.6169e-09
ANK2	0.151631	0.476763	1.65271	1.09035e-30	3.49856e-29
MYPN	0.352387	1.83216	2.37831	8.35352e-13	6.65165e-12
RERGL	0.0500156	0.151773	1.60147	6.48538e-08	2.74772e-07
ADAM12	2.7656	10.8402	1.97072	2.90042e-46	3.68066e-44
VASH1	1.79539	3.877	1.11065	8.22692e-41	6.00438e-39
APOD	5.0141	12.6274	1.33249	6.36743e-27	1.53319e-25
ZNF423	0.259278	0.929378	1.84177	5.69282e-50	1.11374e-47
LRRC14B	0.080066	0.266718	1.73605	1.48099e-10	9.247e-10
DUPD1	0.114241	0.43426	1.92649	7.93758e-11	5.12649e-10
MYOG	1.82686	7.09593	1.95763	2.35287e-10	1.4335e-09
GXYLT2	1.14566	3.0875	1.43026	3.21587e-39	2.00437e-37
COL3A1	157.728	956.49	2.60031	2.96358e-62	8.349e-59
GUCA1A	0.0807361	0.177776	1.13878	6.69311e-26	1.47542e-24
FCN1	0.316786	1.02756	1.69764	1.15674e-25	2.49142e-24
LHFPL6	6.90054	14.1794	1.03902	1.14584e-41	9.38392e-40
CTHRC1	14.7958	47.6508	1.68732	2.10631e-41	1.67624e-39
PILRA	1.80775	3.95795	1.13056	1.73386e-28	4.67877e-27
DKK4	0.515254	0.204319	-1.33446	4.71812e-05	0.000124038
GIMAP6	1.88706	4.17868	1.14691	7.7751e-29	2.16443e-27
JAM2	0.563463	1.63916	1.54056	3.10763e-50	6.25345e-48
CLEC4G	0.242262	0.723498	1.57842	3.36978e-13	2.8037e-12
CHI3L1	11.027	34.1758	1.63193	3.81022e-17	4.38129e-16
EMX2	0.151056	0.316938	1.06912	8.7491e-18	1.05153e-16
SLC40A1	6.44202	14.2086	1.14118	4.83702e-23	8.54885e-22
ACE	0.90673	1.93789	1.09574	1.76978e-37	9.66246e-36
SEMA6C	1.32549	2.70424	1.0287	4.11431e-09	2.11666e-08
LMOD1	0.689327	2.44362	1.82576	2.87461e-46	3.68066e-44
C4orf54	0.093172	0.443018	2.2494	2.41331e-11	1.64222e-10
THY1	8.77886	26.488	1.59323	3.73078e-48	5.53177e-46
DDC	0.298875	0.130594	-1.19445	0.0180656	0.0283882
FSD2	0.0185531	0.0669902	1.85229	0.000108974	0.000267563
PDE4B	1.50654	3.37101	1.16195	8.2407e-32	2.86614e-30
CACNG6	0.286597	1.00242	1.8064	7.93726e-10	4.5495e-09
IL10RA	2.20755	4.5465	1.04231	3.13757e-24	5.99671e-23
SYNPO2L	0.77778	2.49171	1.6797	1.70344e-08	7.95315e-08
PDE1A	0.121338	0.277404	1.19296	4.10351e-34	1.68029e-32
PTGER3	0.230742	0.605365	1.39153	1.86409e-29	5.3917e-28
CDO1	0.34402	0.720562	1.06663	7.18738e-26	1.57452e-24
TRABD2B	0.153276	0.337053	1.13684	1.41707e-24	2.78395e-23
ITGBL1	0.380649	1.98801	2.38479	1.26333e-37	7.06159e-36
GGT5	3.29196	8.18261	1.31362	1.26361e-51	3.29615e-49
ABCC9	0.272536	0.942194	1.78958	3.67007e-44	3.77348e-42
EFEMP2	3.46905	8.8953	1.3585	3.293e-41	2.56272e-39
FCGR2A	3.7511	8.76972	1.22522	1.97387e-36	9.82471e-35
SRL	0.867265	2.61345	1.59141	1.01584e-09	5.74204e-09
RIPPLY3	0.838194	0.377448	-1.15101	0.0155008	0.02476
TDO2	0.7467	1.8674	1.32243	1.81656e-15	1.83955e-14
PTCRA	0.120643	0.249028	1.04556	6.01569e-16	6.32366e-15
NR5A1	2.57519	0.642584	-2.00272	0.00918196	0.0153735
CST1	10.0776	23.808	1.24029	2.95552e-09	1.55399e-08
MMRN1	0.362809	1.06778	1.55733	7.17593e-15	6.85289e-14
PECAM1	7.65788	17.0808	1.15736	1.26839e-41	1.02681e-39
SGCG	0.638846	2.34083	1.87348	4.06034e-12	2.99469e-11
SHD	0.109768	0.271273	1.30529	2.05112e-12	1.56342e-11
GSTA2	0.232507	0.0897254	-1.37369	0.00132419	0.00263863
PDGFD	0.489477	1.22569	1.32428	4.32601e-28	1.13475e-26
CTSG	0.704078	2.1818	1.63171	3.57458e-17	4.11712e-16
KRT24	21.1368	6.57453	-1.6848	1.77569e-05	5.02258e-05
ANGPTL2	9.37002	28.7713	1.61851	1.50446e-52	4.60691e-50
SLC2A5	1.04094	2.16264	1.05491	2.78193e-15	2.76739e-14
FPR1	1.65006	4.12598	1.32222	3.8122e-30	1.19066e-28
HJV	0.32333	1.77176	2.45411	2.10603e-10	1.29262e-09
APOBEC2	1.49928	6.907	2.20379	8.81465e-10	5.04113e-09
SYNPO2	2.84919	8.21056	1.52693	3.6782e-15	3.61053e-14
MYCT1	0.899262	1.88131	1.06492	1.46152e-36	7.43212e-35
CASQ1	0.983138	5.17167	2.39517	1.55068e-09	8.55259e-09
SNAI1	2.08824	4.26893	1.03159	2.92823e-32	1.05491e-30
PSG5	0.107038	0.248692	1.21624	0.00768237	0.0130709
EPYC	0.171895	1.53508	3.15871	1.11314e-19	1.53873e-18
UPK3B	5.52127	2.51349	-1.1353	0.000379231	0.000845763
PDGFRB	9.18265	29.6444	1.69078	2.53449e-57	1.98338e-54
PRELP	1.88477	6.13021	1.70155	1.00587e-29	2.99548e-28
PLA2G7	3.06028	6.65788	1.1214	2.20697e-24	4.25855e-23
RASGRF2	0.27477	0.826644	1.58904	2.53242e-53	8.70042e-51
SLC36A2	0.0337135	0.102285	1.60119	0.00122597	0.00246479
KRTAP5-9	0.317104	0.133925	-1.24353	0.000190237	0.000448556
EDNRA	3.33184	7.43937	1.15886	4.37556e-36	2.08929e-34
AMPH	0.176264	0.563756	1.67733	1.91872e-49	3.60361e-47
SYCE2	0.935243	0.408289	-1.19575	0.0112642	0.0185295
SIGLEC1	1.06129	2.73931	1.36799	1.19544e-25	2.57083e-24
TPM2	28.2174	72.3994	1.35939	3.92503e-21	6.0756e-20
AFF3	0.0755749	0.17468	1.20873	1.40865e-18	1.79893e-17
GJA4	2.48834	4.97852	1.00053	1.3081e-29	3.85479e-28
MUC4	4.04818	1.87111	-1.11338	7.82519e-05	0.000197821
GAS1	5.21254	12.4062	1.25101	1.60628e-40	1.1313e-38
F2RL2	2.63005	6.5547	1.31744	2.40476e-26	5.53487e-25
RAB3IL1	2.03286	4.32676	1.08978	2.06968e-36	1.02293e-34
CH25H	2.33878	4.68736	1.00302	1.78554e-21	2.84515e-20
C1orf194	0.137518	0.057563	-1.25641	0.0267574	0.0403323
SOX17	0.360101	0.769785	1.09605	5.33512e-30	1.64084e-28
GLT8D2	1.62533	5.24938	1.69141	1.26152e-54	5.38479e-52
DCAF4L1	0.158069	0.0718431	-1.13763	0.026793	0.0403816
MMP13	43.7589	107.076	1.29098	4.44493e-20	6.34359e-19
SGIP1	0.201338	0.576554	1.51783	8.39436e-44	8.32697e-42
TMEM176A	3.7257	8.60896	1.20833	4.47426e-37	2.36046e-35
AVPR1A	0.372805	0.838786	1.16988	4.97206e-25	1.01945e-23
CHRND	0.600981	2.94714	2.29393	1.48995e-11	1.03438e-10
MAPT	0.170504	0.436633	1.35661	3.05988e-05	8.31593e-05
KLHL34	0.044903	0.119058	1.40678	9.1719e-15	8.71764e-14
CAVIN4	1.00291	4.74472	2.24213	1.72741e-15	1.75305e-14
MMP12	22.7222	59.499	1.38877	2.78193e-15	2.76739e-14
TRIM55	0.190458	0.726299	1.93109	7.80195e-14	6.95559e-13
DIO2	4.39341	10.8065	1.29848	6.40693e-28	1.67436e-26
FUT6	2.50699	1.04454	-1.26309	2.436e-06	8.06429e-06
BHLHE22	0.155859	0.364776	1.22678	9.78781e-22	1.59389e-20
CD300C	0.703154	1.71438	1.28578	7.35454e-30	2.22787e-28
PDGFRA	1.55856	4.36078	1.48437	2.0256e-44	2.12929e-42
CAP2	2.17938	4.43053	1.02356	7.72599e-15	7.37319e-14
RCN3	12.9257	31.7868	1.29819	2.60204e-36	1.27265e-34
RAPSN	0.599149	1.38004	1.20372	4.79172e-05	0.000125787
PLPPR4	0.389785	0.921437	1.24121	3.21327e-34	1.33124e-32
ABCA9	0.0906926	0.231648	1.35288	2.13244e-26	4.94853e-25
COL5A1	23.987	87.688	1.87012	6.1921e-49	1.03836e-46
PRDM13	0.234138	0.112424	-1.05841	0.00101999	0.00208195
MS4A6A	2.83703	6.25657	1.14099	1.12696e-29	3.33496e-28
SRGN	34.7199	70.1527	1.01474	1.64288e-26	3.85693e-25
MYLK2	0.389865	1.16191	1.57545	4.49339e-10	2.64386e-09
GLIS1	0.551608	1.30813	1.24579	2.16354e-20	3.16137e-19
PLPP4	1.09078	4.68484	2.10265	4.23071e-34	1.72237e-32
CHRDL2	0.305761	1.19646	1.9683	7.42348e-19	9.70011e-18
STMN2	0.0747458	0.180921	1.2753	5.77555e-09	2.89724e-08
WDR38	0.223412	0.103641	-1.10812	0.0169751	0.0268243
NT5C1A	0.0243893	0.106997	2.13324	1.38496e-06	4.75587e-06
CRISPLD2	3.77128	11.0131	1.5461	6.89296e-52	1.8672e-49
LRRN4CL	0.374718	0.811311	1.11445	1.37136e-20	2.02697e-19
SYCP2	2.12457	0.697421	-1.60707	0.00122895	0.00246946
UTS2R	0.0598742	0.156481	1.38598	5.1462e-12	3.75204e-11
ANGPTL7	0.0689871	0.380809	2.46467	2.37706e-19	3.22264e-18
PI16	0.466993	2.8273	2.59795	2.42649e-13	2.05605e-12
CHRDL1	0.490743	1.5644	1.67257	3.90977e-18	4.81829e-17
ENPP1	0.341466	1.08846	1.67247	2.06087e-37	1.12083e-35
MAGEL2	0.043439	0.240863	2.47115	1.12241e-48	1.77643e-46
TWIST1	3.46262	8.05262	1.21759	7.99573e-29	2.21708e-27
ATP1A2	0.635016	3.45272	2.44287	3.8476e-16	4.10274e-15
MEF2C	1.10559	4.07605	1.88236	1.7948e-34	7.61491e-33
CLIC5	0.245937	0.624977	1.34552	4.96678e-14	4.49628e-13
XIRP1	0.876122	3.77547	2.10745	9.27407e-23	1.60288e-21
CPQ	3.26726	6.94497	1.08789	1.34102e-32	4.932e-31
MYH3	1.53846	5.80726	1.91637	4.39427e-07	1.63577e-06
ATP13A5	2.13612	0.224478	-3.25035	0.00386845	0.00698244
TRDN	0.854661	4.23615	2.30933	8.25532e-11	5.31951e-10
STARD13	1.13415	2.43443	1.10197	4.32591e-40	2.94371e-38
FGF18	0.138345	0.442638	1.67786	1.87996e-20	2.75845e-19
CKMT2	0.812147	3.14347	1.95254	1.60767e-07	6.43708e-07
DOK5	0.270097	0.88672	1.715	9.2912e-47	1.22314e-44
STARD8	0.515597	1.33833	1.37612	7.43609e-52	1.97632e-49
TM6SF2	0.0863752	0.227752	1.39877	2.90766e-28	7.68429e-27
RCSD1	1.27298	2.62243	1.04269	1.87813e-26	4.38002e-25
PPP1R3A	0.0549667	0.421972	2.94052	1.42763e-12	1.1098e-11
IP6K3	0.563858	1.91886	1.76685	6.14529e-07	2.23792e-06
DRP2	0.0633946	0.158544	1.32245	1.43539e-24	2.816e-23
RSPO1	0.108363	0.267822	1.3054	2.04665e-08	9.43671e-08
LILRB2	1.33667	3.01748	1.1747	5.44525e-25	1.11162e-23
OMD	0.514715	3.53951	2.78171	5.69025e-45	6.26194e-43
ASB10	0.0487389	0.253107	2.3766	3.29793e-13	2.75205e-12
IGSF6	1.84445	3.76265	1.02856	1.69336e-25	3.5977e-24
AQP9	0.772416	2.8257	1.87116	7.86467e-20	1.10121e-18
SMTNL2	0.641612	2.22148	1.79175	4.76137e-17	5.44831e-16
MRAS	1.41828	3.42897	1.27363	1.15957e-40	8.29118e-39
IL2RA	1.64597	3.52374	1.09817	7.46008e-30	2.25499e-28
RARRES2	7.28152	24.6196	1.7575	3.24142e-43	3.04391e-41
DACT1	0.759617	3.58494	2.2386	4.91267e-51	1.14514e-48
MIOX	0.543583	0.170563	-1.67219	0.000214698	0.000499625
WDR86	0.235954	0.601182	1.34929	2.26141e-35	1.03423e-33
ZNF521	0.588676	1.94117	1.72139	1.93201e-55	1.00794e-52
LAPTM5	31.5985	65.0649	1.04203	1.73674e-29	5.04407e-28
SCARF2	1.56828	5.10955	1.70401	4.90288e-43	4.54355e-41
CPXM2	2.68835	5.72024	1.08935	1.46726e-28	3.98993e-27
EPHA3	0.321128	1.1568	1.84893	1.18391e-35	5.54038e-34
ROS1	0.343668	0.788639	1.19835	3.31656e-07	1.2582e-06
GALNT15	0.525301	2.26923	2.11099	1.81219e-48	2.77461e-46
EEF1A2	12.4885	25.994	1.05758	0.000389233	0.000865057
PADI2	2.05439	7.06343	1.78166	1.85836e-18	2.35192e-17
LAIR1	1.25534	2.92752	1.2216	1.32511e-30	4.23253e-29
FHL5	0.164473	0.467171	1.5061	1.21057e-25	2.59546e-24
ACTC1	9.52756	36.7915	1.94919	6.93871e-13	5.58188e-12
RPL3L	1.00045	2.20026	1.13702	0.000859179	0.00178396
PLXDC1	1.25619	3.04837	1.27898	7.83047e-44	7.8227e-42
P4HA3	0.583989	2.09726	1.84449	4.27451e-41	3.23714e-39
MYMK	0.167879	0.732107	2.12463	1.21454e-11	8.49757e-11
SH3RF3	1.26286	2.65055	1.0696	1.22339e-37	6.86559e-36
PEG3	0.103297	0.32338	1.64643	3.51099e-32	1.25842e-30
LILRB5	0.326669	0.810873	1.31165	8.09085e-24	1.49958e-22
CD163	3.05833	10.522	1.7826	9.53451e-38	5.3937e-36
ADAMTS10	0.409488	0.909294	1.15093	1.10564e-34	4.77733e-33
ADCYAP1	0.119455	0.295972	1.30899	5.84409e-09	2.93058e-08
LBP	0.265278	1.3779	2.37689	3.38519e-08	1.50565e-07
C3orf80	0.482908	1.31721	1.44766	1.63455e-38	9.83944e-37
ITGA4	0.803906	1.86509	1.21415	9.77668e-30	2.91768e-28
FGR	1.92024	3.9778	1.05069	6.92157e-25	1.39083e-23
GALNT16	0.0926649	0.229609	1.30908	1.55398e-15	1.58046e-14
DCLK1	0.311267	0.928886	1.57735	1.61803e-29	4.71875e-28
ASPN	5.5363	33.2081	2.58454	2.61204e-43	2.46934e-41
SAMD11	0.434441	0.881786	1.02127	2.97281e-12	2.22384e-11
BNC2	0.189415	0.915143	2.27245	3.41125e-53	1.11746e-50
KIF26B	1.13491	2.98086	1.39315	2.16233e-37	1.16699e-35
GRID1	0.178897	0.399573	1.15933	7.16427e-32	2.50412e-30
SLAMF8	3.51472	8.26231	1.23314	3.7156e-34	1.53035e-32
COL11A1	1.74852	15.1204	3.11229	3.94623e-41	3.00468e-39
CLEC4A	1.49953	3.02917	1.01441	2.01021e-27	5.08362e-26
GIMAP8	1.37113	2.77665	1.01799	7.3369e-25	1.46801e-23
SIRPB1	0.16606	0.403931	1.28241	5.67075e-17	6.40049e-16
C16orf45	1.15652	2.5179	1.12243	5.20834e-38	3.00675e-36
ACTN2	3.77582	19.7562	2.38744	1.27392e-11	8.89657e-11
PLA2G2D	0.793232	1.72976	1.12476	1.36907e-09	7.6074e-09
PRICKLE1	0.836465	1.69602	1.01978	3.3868e-25	7.04675e-24
SIGLEC7	0.349972	0.887317	1.34221	5.45272e-32	1.92499e-30
ARHGAP20	0.165259	0.338047	1.0325	3.39922e-19	4.56013e-18
EDIL3	3.75748	7.66747	1.02899	4.65436e-18	5.70099e-17
CKM	25.1443	120.186	2.25696	4.98231e-09	2.52631e-08
MYH8	0.191193	1.53258	3.00286	1.59047e-12	1.22826e-11
GCNT3	2.26712	1.09388	-1.0514	1.37545e-05	3.97508e-05
TNXB	0.302498	1.02223	1.75672	1.0007e-15	1.03646e-14
PPEF1	0.175015	0.51659	1.56154	2.02021e-28	5.43066e-27
LILRA6	0.285783	0.662312	1.21259	5.20152e-26	1.17043e-24
ITIH3	0.0699637	0.16138	1.20579	1.88391e-16	2.04444e-15
MAP1LC3C	0.101506	0.249442	1.29714	2.4434e-21	3.84127e-20
SIGLEC8	0.172262	0.381996	1.14896	1.18733e-19	1.63488e-18
SERPINA9	0.173354	0.490395	1.50022	3.06151e-05	8.31876e-05
VGLL3	0.525855	1.63181	1.63373	5.27395e-41	3.95153e-39
NKAPL	0.0815919	0.187181	1.19794	1.77035e-29	5.13111e-28
ADGRD1	0.111636	0.256848	1.20212	5.80579e-31	1.89746e-29
FAT4	0.235393	0.62936	1.41881	5.07491e-30	1.56766e-28
CSRP3	8.25998	34.437	2.05975	4.89332e-09	2.48387e-08
FMOD	9.94495	28.649	1.52645	1.01209e-50	2.19327e-48
SLC8A1	0.206503	0.441766	1.09712	6.07354e-27	1.47249e-25
SLC9A4	0.467623	0.155912	-1.58461	0.00502009	0.00886683
CCL7	0.359852	1.06501	1.56539	1.22591e-12	9.60411e-12
OSM	1.5655	4.40741	1.49331	3.58718e-14	3.27898e-13
PLA2G5	0.101391	0.232487	1.19723	1.10199e-22	1.88841e-21
MYOM1	0.583944	2.61541	2.16313	1.50192e-12	1.16306e-11
TNFSF8	0.284857	0.627486	1.13935	3.06691e-26	7.0017e-25
ANPEP	3.70252	9.15459	1.30599	2.1626e-42	1.85746e-40
TNS1	3.50255	8.16004	1.22017	1.25394e-32	4.62382e-31
XIRP2	1.16415	6.62365	2.50835	1.32326e-09	7.36738e-09
SUCNR1	0.287755	0.669584	1.21842	1.55937e-23	2.83059e-22
C5orf46	0.587083	1.63549	1.47808	3.7532e-12	2.78251e-11
CTNNA3	0.0236604	0.114565	2.27562	2.7516e-16	2.95871e-15
FITM1	0.615123	1.70528	1.47106	0.000102238	0.000252875
THBS2	16.6049	57.389	1.78917	1.85415e-46	2.39611e-44
ARHGEF6	1.2691	2.92427	1.20427	1.54477e-36	7.79917e-35
CNRIP1	0.756912	1.78847	1.24053	1.07174e-55	5.92165e-53
TMEM233	0.134959	0.35562	1.39781	1.84423e-24	3.58314e-23
AMTN	26.2265	54.48	1.0547	0.0108308	0.0178798
ADCY2	0.1342	0.407062	1.60086	8.76029e-17	9.77018e-16
LRCH2	0.165659	0.461959	1.47954	7.20383e-46	8.67292e-44
FCGR3A	9.09575	21.321	1.22901	1.34964e-28	3.6843e-27
GALR2	0.737134	0.258245	-1.51318	3.93897e-05	0.000104905
ABCB4	0.0777829	0.183181	1.23574	2.62153e-35	1.19119e-33
TMEM119	1.93065	8.09623	2.06816	8.46446e-49	1.3864e-46
FAM198B	2.05332	7.50454	1.8698	4.15837e-63	1.95249e-59
FXYD1	0.295048	0.77867	1.40006	1.25877e-10	7.92628e-10
TIMP3	1.10657	2.63548	1.25198	1.98132e-26	4.61303e-25
ARHGEF15	0.750945	1.52977	1.02653	1.26514e-33	4.95022e-32
WNT2	0.814137	3.37122	2.04993	3.12408e-37	1.67323e-35
WISP1	2.44373	6.82272	1.48126	2.33001e-44	2.43115e-42
DACT3	0.302936	0.794157	1.39041	1.83661e-34	7.76893e-33
CILP	0.214308	1.60614	2.90584	6.06953e-33	2.28597e-31
MSR1	1.02803	3.12248	1.6028	1.39372e-36	7.11302e-35
FKBP7	1.39215	3.32247	1.25495	4.04623e-39	2.5108e-37
ART1	0.0199203	0.117431	2.55951	7.47677e-13	5.99077e-12
MYF5	0.0878056	0.283422	1.69056	1.2655e-12	9.90326e-12
TNNT1	29.3038	60.0285	1.03456	0.000712577	0.00150508
YIPF7	0.062162	0.271664	2.12772	7.32991e-13	5.87979e-12
FGD5	1.05201	2.4832	1.23906	4.86021e-48	7.05783e-46
LRRC17	0.857549	4.37276	2.35025	1.21813e-36	6.26224e-35
LPL	0.958904	2.89174	1.59248	9.30196e-30	2.78782e-28
SUSD2	1.08831	4.07078	1.90321	1.86561e-26	4.35804e-25
SELP	1.00704	2.43679	1.27486	3.67616e-12	2.72826e-11
CCR8	0.44769	1.12395	1.328	9.67042e-28	2.50861e-26
KCNA7	0.124765	0.409155	1.71344	3.03064e-05	8.24759e-05
RGS5	3.81598	7.99564	1.06716	1.13793e-21	1.84452e-20
LMOD3	0.591179	3.07703	2.37987	1.34251e-10	8.42716e-10
FOXA1	5.05315	2.40551	-1.07084	6.0529e-05	0.000155899
PREX2	0.190874	0.393	1.04191	6.07354e-27	1.47249e-25
JPH2	0.794091	2.09172	1.39731	2.4222e-18	3.03551e-17
SMPX	3.31154	12.8288	1.95381	1.78636e-10	1.10411e-09
COLEC12	0.899301	3.83742	2.09326	5.76396e-56	3.53005e-53
MS4A7	1.78465	4.39435	1.30001	8.78925e-34	3.48748e-32
SIGLEC14	0.589855	1.3447	1.18885	2.14952e-17	2.51479e-16
MCEMP1	0.253029	0.609673	1.26873	4.1815e-14	3.80249e-13
SLIT2	0.628891	1.27605	1.02081	1.32397e-20	1.96104e-19
TNNI1	4.3279	17.4617	2.01246	4.21787e-08	1.84169e-07
PCP4L1	6.55646	3.17575	-1.04582	0.000281233	0.000641115
GCGR	0.26633	0.127132	-1.06689	0.000718035	0.00151524
TCF4	1.89354	3.85468	1.02553	2.68338e-35	1.21537e-33
ACTA2	14.9689	48.9738	1.71004	1.96885e-47	2.74586e-45
TNNC2	13.6264	35.1177	1.3658	1.23764e-06	4.28653e-06
TBX15	0.884473	2.25117	1.34779	2.31882e-22	3.92111e-21
FPR2	0.227475	0.739024	1.69991	3.39642e-15	3.36205e-14
CD1B	0.31784	0.704198	1.14768	1.68334e-14	1.5703e-13
COL1A2	91.795	514.645	2.48709	5.46873e-60	7.00296e-57
MSRB3	1.72739	4.51371	1.38572	2.27801e-48	3.41362e-46
AMPD1	0.363229	1.46877	2.01566	4.65215e-12	3.40594e-11
PLAC9	1.04849	2.81242	1.4235	2.57534e-28	6.8317e-27
LDHC	0.354067	0.169734	-1.06075	0.00356768	0.00648193
MYH2	9.18474	53.4288	2.54031	3.96473e-10	2.34751e-09
TMEM176B	12.9503	29.3366	1.17971	1.38745e-34	5.94031e-33
CHST4	0.224772	0.0917391	-1.29285	0.0238561	0.0363913
LDLRAD1	0.272504	0.118886	-1.1967	1.73235e-06	5.86582e-06
CLEC4D	0.0908548	0.185418	1.02915	1.83061e-12	1.40523e-11
SIGLEC10	1.55097	3.35107	1.11146	5.03588e-21	7.72717e-20
CXCL12	2.56157	9.38871	1.8739	2.89105e-42	2.45321e-40
MAP7D2	1.87375	0.907109	-1.04658	0.0219909	0.0338762
SLN	10.8537	39.1186	1.84967	3.70928e-12	2.75139e-11
APELA	0.125027	0.369453	1.56315	2.39512e-18	3.00759e-17
SERPINA5	0.122626	0.375635	1.61507	3.62177e-18	4.46727e-17
MARCO	2.37297	4.95242	1.06144	1.09639e-06	3.818e-06
DLK1	0.330606	1.23792	1.90473	2.56167e-05	7.07524e-05
DCSTAMP	0.137472	0.35631	1.37399	1.17682e-19	1.62357e-18
FBP1	5.62382	12.1602	1.11255	1.31142e-10	8.23939e-10
ITGA7	1.97663	4.61179	1.22228	1.10935e-18	1.42707e-17
CCL13	2.79128	7.10475	1.34786	3.92251e-24	7.45647e-23
SOD3	3.08079	7.32367	1.24927	2.81554e-36	1.37231e-34
ADAMTS3	0.168302	0.345379	1.03713	2.26148e-19	3.0689e-18
PXDN	7.43352	17.7042	1.25198	2.08457e-33	8.04474e-32
DDR2	1.042	3.58394	1.7822	4.53996e-52	1.25392e-49
TMPRSS11A	14.8496	7.01294	-1.08233	0.000391077	0.000868472
MUSK	0.0630048	0.181605	1.52727	9.32994e-12	6.64416e-11
SLC2A3	4.30056	8.68123	1.01337	3.13757e-24	5.99671e-23
LMCD1	1.50902	3.52893	1.22562	5.28363e-36	2.49749e-34
PDE7B	0.271066	0.681672	1.33043	1.99044e-44	2.10807e-42
WIPF1	3.48281	7.75177	1.15427	8.9458e-41	6.46208e-39
TLR7	0.27845	0.809341	1.53933	1.02192e-27	2.6364e-26
CSMD2	0.133566	0.293475	1.13569	3.30331e-30	1.03401e-28
ANGPT1	0.252189	0.518258	1.03916	1.14574e-24	2.2699e-23
GUCY1A2	0.231703	0.606048	1.38715	1.40081e-43	1.36081e-41
CR1	0.057379	0.189825	1.72608	1.23788e-27	3.15885e-26
PTPRN	0.118583	0.483988	2.02908	1.40024e-17	1.66305e-16
METTL11B	0.106084	0.289444	1.44808	4.05132e-19	5.39385e-18
IBSP	0.728025	1.76039	1.27383	1.04361e-09	5.89193e-09
TAGLN	16.3103	51.9224	1.67058	3.11176e-45	3.56359e-43
SALL1	0.160321	0.382052	1.2528	3.24299e-19	4.35885e-18
PREX1	2.92994	5.91775	1.01418	1.05928e-30	3.40662e-29
ASB11	0.0357202	0.225605	2.65899	2.03742e-10	1.25214e-09
NRROS	0.988546	1.99143	1.01042	6.91452e-26	1.51947e-24
PRG4	0.124741	0.945556	2.92222	5.64069e-17	6.37167e-16
LRTM1	0.0165474	0.0573798	1.79394	0.00101416	0.00207096
DCN	10.7396	38.3353	1.83574	9.3387e-56	5.48104e-53
SLCO5A1	0.146323	0.36782	1.32985	7.17859e-19	9.39754e-18
DPT	3.48299	13.8302	1.98942	1.42794e-35	6.66023e-34
CHIT1	1.03149	3.7195	1.85038	9.58062e-10	5.44603e-09
MMP8	0.0600059	0.313372	2.3847	1.72255e-21	2.74789e-20
IRF8	1.73112	3.74409	1.11291	3.10729e-23	5.56153e-22
ADGRL4	2.18113	4.75859	1.12546	5.66965e-45	6.26194e-43
AC136428.1	0.820597	1.78627	1.1222	7.55465e-06	2.28162e-05
JCAD	1.00158	3.18298	1.6681	1.12797e-57	1.03361e-54
TSPAN11	1.25032	3.33316	1.41459	6.15611e-27	1.48739e-25
RBM24	0.471437	1.8523	1.97418	6.86421e-19	9.00279e-18
HBQ1	0.393419	0.121901	-1.69035	0.00828045	0.0140089
TLX2	0.351769	0.162306	-1.11591	4.53361e-08	1.96979e-07
P3H3	4.15115	8.44368	1.02436	2.25496e-21	3.56092e-20
MMP19	2.33287	4.70903	1.01333	8.59117e-34	3.41851e-32
LDB2	0.67941	1.60001	1.23572	8.04645e-47	1.0892e-44
LRRC32	3.05075	8.49042	1.47667	1.0795e-54	4.79836e-52
FMO1	0.948439	2.62987	1.47137	1.23146e-26	2.92027e-25
DCHS1	0.818853	2.50593	1.61367	2.35547e-42	2.01086e-40
CEL	8.67673	3.01361	-1.52566	8.97692e-08	3.72018e-07
FIBIN	1.12432	5.54351	2.30175	5.1491e-51	1.16984e-48
SYNDIG1	0.565099	1.78135	1.6564	8.84958e-30	2.66928e-28
MYADML2	0.190242	0.600757	1.65894	1.26051e-05	3.67002e-05
C1QB	56.5522	115.629	1.03185	3.53442e-22	5.91985e-21
ITGA8	0.314533	0.71757	1.18991	5.75308e-29	1.6079e-27
CD248	13.4248	31.4663	1.22891	2.24017e-39	1.4214e-37
HRK	0.378359	0.172242	-1.13532	0.00315969	0.00581188
NID2	1.31287	5.1931	1.98387	4.07026e-51	9.71758e-49
MYBPC1	4.01366	17.5741	2.13046	1.69139e-08	7.90212e-08
HMCN1	0.563937	2.30634	2.032	7.37278e-42	6.18173e-40
EVI2A	1.69278	3.75109	1.14791	1.26231e-31	4.3053e-30
GLIS3	0.394039	1.06597	1.43576	6.97676e-43	6.3403e-41
SPX	0.0391786	0.135152	1.78644	2.67863e-09	1.4174e-08
DAAM2	0.4971	1.55524	1.64553	3.68344e-52	1.10393e-49
FERMT2	1.6932	3.8073	1.16902	2.0122e-35	9.26267e-34
ADAMTS4	1.70623	4.43545	1.37827	3.10362e-38	1.81401e-36
ITGB3	0.301034	0.736862	1.29147	3.83091e-34	1.57324e-32
CD34	2.00838	4.17737	1.05656	6.84131e-41	5.07193e-39
TDRD6	0.0763341	0.176023	1.20536	2.38876e-26	5.50705e-25
MYL1	16.354	64.5346	1.98043	6.11228e-09	3.05527e-08
OLFML3	4.91319	19.7524	2.0073	1.99902e-61	3.12868e-58
RGS16	3.27945	8.00073	1.28668	1.62709e-27	4.12958e-26
CD53	9.77591	20.555	1.07219	5.37678e-26	1.20793e-24
CDH5	2.29724	5.34748	1.21895	3.55223e-41	2.74927e-39
FBXO40	0.0402366	0.281693	2.80755	2.57817e-10	1.56535e-09
GFRA2	0.121548	0.31006	1.35102	1.80906e-24	3.51967e-23
PRKG1	0.658175	1.71183	1.379	9.50474e-43	8.47365e-41
CNTN3	0.0408829	0.173387	2.08443	5.90947e-25	1.2029e-23
KLHL40	0.462856	1.97139	2.09058	3.3036e-11	2.21171e-10
TCEAL7	0.456316	1.50605	1.72267	9.82216e-40	6.52628e-38
SLCO2B1	1.69857	4.81414	1.50295	1.11488e-38	6.79838e-37
PTCH2	0.212693	0.546372	1.36111	0.00727696	0.0124412
PLXNC1	1.03319	3.15102	1.60871	4.95908e-51	1.14514e-48
REC8	3.18898	1.59301	-1.00134	3.2607e-07	1.23935e-06
ARSE	0.356322	0.786822	1.14286	1.71704e-22	2.92111e-21
PTPRB	0.564665	1.15569	1.03329	5.18481e-33	1.958e-31
CASS4	0.21722	0.569014	1.38931	1.82125e-31	6.12272e-30
CACNB1	1.08887	2.39125	1.13493	3.5924e-06	1.15716e-05
CD28	0.442269	0.959019	1.11663	6.42932e-26	1.42395e-24
CLEC11A	5.69717	14.2319	1.32081	9.40807e-32	3.24015e-30
MRC1	1.71619	6.53929	1.92993	1.65981e-37	9.09729e-36
SLIT3	1.15778	2.43398	1.07195	5.63201e-26	1.25925e-24
CCDC190	2.67171	1.14139	-1.22697	0.00471871	0.00837442
TLX3	1.17194	0.495458	-1.24206	0.000321819	0.000726932
HS3ST6	2.19834	1.01485	-1.11515	0.00155582	0.00305567
ADAMTS5	0.280808	1.00094	1.8337	5.57714e-44	5.6114e-42
GUCY1A1	1.58312	4.02977	1.34793	2.26218e-38	1.35021e-36
MUSTN1	0.20291	0.603436	1.57236	1.7509e-08	8.15851e-08
PODN	0.944745	4.7737	2.33711	7.17381e-49	1.18883e-46
STOX1	1.04075	0.468703	-1.15088	0.03082	0.045775
MYOD1	0.136405	0.560273	2.03823	8.5255e-09	4.17269e-08
