# Supplementary material for: P2RY14 Is a Potential Biomarker of Tumor Microenvironment Immunomodulation and Favorable Prognosis in Patients With Head and Neck Cancer
Source: Front Genet. 2021 Jul 8;12:670746. doi: 10.3389/fgene.2021.670746 (PMC8297391; doi:10.3389/fgene.2021.670746)
Supplement: Supplementary Table 3 — Identical up and down-regulate differential genes from stromal and immune groups. [file Table_3.XLSX]

## Sheet: Immune.Diff
gene	conMean	treatMean	logFC	pValue	fdr
GALNT17	0.234424	0.835683	1.83384	4.91466e-06	4.26216e-05
S100B	1.95347	5.84027	1.57999	2.40785e-17	6.69442e-16
ZNF671	0.235299	0.531604	1.17585	7.38614e-16	1.84431e-14
NTRK1	0.0966028	0.267363	1.46866	1.84294e-11	3.36407e-10
P2RY12	0.0407558	0.232747	2.51369	2.16025e-19	6.77459e-18
GSTM2	2.40574	1.13325	-1.08601	0.000146585	0.00082549
MRAP2	6.08279	2.39058	-1.34737	0.0040625	0.0132585
MAN1C1	0.278578	0.637407	1.19413	9.98599e-15	2.30636e-13
CBLN2	0.0943504	0.407662	2.11127	0.00168258	0.00643936
CLEC3B	1.13992	2.43369	1.09421	2.26111e-09	3.39269e-08
UPK1B	60.3724	26.7173	-1.17611	0.00125016	0.00502572
APOE	21.7074	80.253	1.88637	8.06326e-14	1.74361e-12
ADAMDEC1	0.352503	3.77956	3.42251	5.74826e-28	3.80362e-26
BST2	135.479	275.784	1.02547	4.63987e-09	6.69618e-08
BLK	0.163153	0.331574	1.0231	9.20012e-11	1.57713e-09
F13A1	4.01335	9.31711	1.21508	2.83636e-06	2.59767e-05
TNN	0.212902	0.428464	1.00898	2.61043e-05	0.000187346
GPR34	0.432734	1.90634	2.13925	1.5588e-27	9.96577e-26
AKAP5	0.119298	0.348883	1.54818	4.07747e-20	1.36611e-18
SAA2-SAA4	1.10519	2.71225	1.29519	1.17566e-05	9.27026e-05
ALOX5	1.03445	3.80602	1.87943	1.67208e-24	7.79166e-23
MS4A14	0.0949071	0.270441	1.51072	7.56616e-18	2.16733e-16
GUCY2C	1.27028	0.405833	-1.64619	0.000215499	0.00114535
XCL2	0.326062	0.814255	1.32034	1.06544e-11	1.98035e-10
CD244	0.164257	0.523886	1.6733	1.97413e-18	5.85778e-17
JCHAIN	8.64216	87.7767	3.34437	6.22001e-18	1.78947e-16
SP140	0.420392	0.985268	1.22878	2.91326e-19	9.05027e-18
IKZF3	0.423281	1.93977	2.1962	1.05722e-23	4.61756e-22
ATP10A	0.406717	0.817888	1.00788	1.37978e-12	2.71322e-11
ZNF831	0.0186586	0.208104	3.4794	8.12047e-32	1.01383e-29
JPH3	0.475922	0.230137	-1.04823	0.0155512	0.0387952
CSF1R	2.16081	10.8193	2.32396	1.01837e-32	1.72783e-30
CHI3L2	1.05234	3.44646	1.71151	2.35205e-12	4.53746e-11
ABCD2	0.0177523	0.135319	2.93029	1.09689e-26	6.45168e-25
FMO3	0.908374	2.8267	1.63776	1.60963e-06	1.55261e-05
PINLYP	2.73841	1.35975	-1.01	0.00249202	0.0089375
OAS2	16.5879	36.6163	1.14235	1.25651e-12	2.47819e-11
NUPR2	2.97266	0.824253	-1.8506	7.68725e-05	0.000475388
PENK	0.207069	0.716697	1.79125	0.00592168	0.0179866
CYP4F2	0.285235	0.12032	-1.24527	0.000107772	0.000634739
SIGLEC9	0.26176	0.911251	1.79961	1.23014e-27	7.98025e-26
CCL14	0.0430092	0.103333	1.26459	6.12967e-06	5.17532e-05
GPR18	0.0602184	0.375261	2.63962	2.18512e-25	1.11223e-23
ADA2	2.00169	7.19096	1.84497	1.14205e-21	4.31826e-20
ARHGAP30	2.03871	5.85205	1.52129	3.04094e-25	1.52439e-23
ESR1	0.189984	0.415975	1.13062	5.91697e-07	6.19994e-06
TM6SF1	0.198735	0.538575	1.4383	3.21306e-17	8.89574e-16
INPP5D	1.237	2.99955	1.27791	1.41833e-21	5.33243e-20
DNAJC5B	0.0294498	0.143935	2.28909	4.08646e-15	9.76177e-14
CASP5	0.120605	0.356028	1.5617	2.15219e-16	5.5957e-15
CPNE5	0.709769	1.62225	1.19258	1.20455e-11	2.22639e-10
FASLG	0.111342	0.831025	2.89989	1.4431e-30	1.42596e-28
CTSW	0.625508	4.18167	2.74098	7.19694e-29	5.3508e-27
IFI35	14.7831	36.8525	1.31782	2.23576e-17	6.22905e-16
MAPK8IP1	3.65405	1.62036	-1.17318	0.0105729	0.0286138
PRF1	1.94767	7.09626	1.86531	5.53303e-28	3.69819e-26
CCL2	4.59298	12.8264	1.48161	3.77905e-17	1.0333e-15
GPR171	0.147638	0.994918	2.75251	8.28639e-30	7.21461e-28
ME1	29.5729	12.6022	-1.2306	2.31528e-06	2.16081e-05
KLRC1	0.0529087	0.320002	2.5965	1.1095e-25	5.73558e-24
IL15	0.403715	0.958014	1.24671	2.89199e-14	6.53117e-13
CYBB	1.45883	9.94288	2.76885	1.33261e-32	2.1507e-30
PTPRO	0.184726	0.392706	1.08806	2.48032e-13	5.15299e-12
HCST	1.21542	7.13604	2.55367	4.35856e-37	9.20249e-34
MAJIN	0.0514293	0.171676	1.73902	0.000231305	0.00121676
TEX29	0.43628	0.891545	1.03105	1.21694e-08	1.67238e-07
SLAMF7	1.35351	5.78946	2.09672	4.24687e-25	2.10499e-23
CD1A	1.50355	3.54761	1.23847	3.3953e-07	3.72582e-06
FPR3	1.49598	8.16115	2.44768	6.10104e-32	7.9158e-30
GLDC	1.3606	2.92177	1.1026	2.3184e-05	0.000168674
EXOC3L4	0.471644	1.18303	1.32671	7.40908e-07	7.62455e-06
LY86	0.537378	2.68293	2.3198	6.89709e-32	8.77655e-30
PTGER2	0.254034	0.666811	1.39226	3.25858e-12	6.22282e-11
CD79A	1.40513	11.8556	3.07679	4.00836e-17	1.09375e-15
C7	0.120322	0.807913	2.7473	3.76843e-05	0.000259073
ARHGAP9	0.481249	2.19415	2.18881	1.37213e-34	3.49208e-32
CHST13	0.0960309	0.193383	1.00989	1.47888e-13	3.12145e-12
DOK2	1.1832	5.02623	2.08678	2.26236e-34	5.34645e-32
KCNMB1	0.210772	0.442986	1.07158	1.64468e-15	4.00841e-14
PLPPR1	0.570445	0.203022	-1.49045	2.04987e-05	0.000151468
CTSK	26.0778	55.6106	1.09254	1.79296e-08	2.40894e-07
SSTR2	0.131931	0.453989	1.78287	4.48218e-11	7.94072e-10
C3AR1	1.0803	5.43114	2.32983	2.20916e-32	3.28495e-30
CD52	3.41738	18.3932	2.42821	2.57451e-30	2.39937e-28
CCL3	1.71848	5.46151	1.66816	2.5796e-18	7.62019e-17
LYL1	0.549062	1.13301	1.04512	4.28159e-14	9.49122e-13
PDE1B	0.1123	0.239432	1.09225	3.8596e-15	9.25326e-14
CCL3L1	0.641477	1.67089	1.38115	6.07354e-09	8.65202e-08
MILR1	0.296876	1.2287	2.0492	1.44385e-30	1.42596e-28
FCER1A	1.13897	2.95629	1.37605	9.71921e-07	9.68554e-06
INHBE	0.49358	0.240689	-1.03611	0.0083698	0.0236983
CCR2	0.07743	0.678746	3.13191	2.18499e-28	1.50605e-26
RASSF4	0.852963	2.4857	1.5431	6.06749e-21	2.15274e-19
C4A	0.124816	0.377559	1.5969	5.66958e-13	1.15255e-11
FNDC1	2.63481	5.89766	1.16244	3.02772e-05	0.000213359
VENTX	0.0941606	0.219045	1.21803	1.98522e-15	4.82062e-14
NR3C2	0.193508	0.396775	1.03593	0.00239427	0.00865024
FRZB	0.478475	1.40687	1.55597	6.52812e-09	9.26965e-08
LGI2	0.168304	0.827905	2.2984	1.74863e-08	2.35656e-07
LTB	1.63867	7.53373	2.20084	2.87935e-26	1.58772e-24
HK3	0.449366	2.18993	2.28492	2.41871e-23	1.00976e-21
OLFML1	0.852325	1.79602	1.07533	5.32703e-10	8.4835e-09
LGALS9	2.83803	9.56287	1.75255	1.38649e-22	5.47726e-21
USH1C	0.26869	0.124301	-1.1121	0.000190117	0.00102946
ADRA2A	0.559485	1.59418	1.51065	2.05694e-08	2.74135e-07
CEACAM4	0.139023	0.571333	2.03901	6.58519e-24	2.97435e-22
COL6A6	0.0584271	0.191991	1.71633	3.41567e-08	4.41005e-07
APOBR	1.49381	3.94311	1.40034	1.22657e-23	5.30473e-22
GPR183	2.01047	7.6333	1.92477	5.63963e-28	3.7505e-26
SIDT1	0.205316	0.582122	1.50347	1.92898e-13	4.05209e-12
IQGAP2	0.404266	1.28044	1.66326	3.73298e-20	1.25387e-18
UBA7	3.70454	10.04	1.4384	1.32861e-22	5.28013e-21
ZEB2	0.524667	1.13883	1.11808	1.50549e-12	2.95165e-11
GSTA3	0.757401	0.243954	-1.63445	2.26568e-05	0.000165292
NR1H3	1.56156	3.24926	1.05712	9.84376e-13	1.95311e-11
CD80	0.138364	0.546471	1.98168	7.55959e-26	4.01782e-24
GFI1	0.501216	1.11608	1.15493	7.5017e-14	1.62484e-12
PLD4	0.0954452	0.502716	2.397	1.13963e-26	6.6734e-25
APOBEC3H	0.265975	0.783394	1.55845	1.93208e-16	5.04321e-15
PYHIN1	0.0789949	0.547396	2.79275	1.21814e-30	1.24967e-28
NCF4	1.42381	5.68633	1.99774	8.30845e-35	2.24396e-32
ROR1	0.245305	0.552259	1.17076	6.64305e-11	1.15373e-09
UPB1	0.0601729	0.196198	1.70512	1.2401e-07	1.47817e-06
SNX20	0.300506	1.4305	2.25106	2.97705e-32	4.14719e-30
NKX2-2	0.527221	0.250242	-1.07508	0.000294488	0.00149149
MGAM2	0.00920282	0.0520003	2.49837	0.00255581	0.00914151
TMEM150B	0.186504	0.792237	2.08672	2.49952e-27	1.56032e-25
LRRC55	0.0839663	0.343996	2.03451	0.00238742	0.00863022
F5	0.120967	0.483367	1.99851	4.31285e-20	1.44132e-18
CD2	1.21712	10.5609	3.11719	5.74389e-37	9.50182e-34
KIAA0319	0.672515	0.191719	-1.81057	0.000866177	0.00369178
DERL3	1.66763	6.62314	1.98971	5.65246e-14	1.24054e-12
CD3G	0.142939	1.38826	3.2798	7.1205e-36	4.48727e-33
CCR4	0.159498	1.08384	2.76453	1.18445e-23	5.13936e-22
SIGLEC6	0.0429559	0.142995	1.73503	5.06387e-10	8.07412e-09
LTA	0.103491	0.594276	2.52164	2.51166e-28	1.71336e-26
FCAR	0.0786303	0.184038	1.22684	3.02665e-05	0.000213359
HLA-F	13.2916	33.752	1.34446	2.03007e-17	5.67991e-16
FCRL6	0.0455681	0.240421	2.39947	6.93516e-21	2.43448e-19
CX3CR1	0.1148	0.516401	2.16936	6.11363e-19	1.87721e-17
NUGGC	0.0467706	0.288701	2.6259	1.18644e-19	3.8296e-18
RGS18	0.122949	0.573662	2.22214	6.63203e-28	4.36658e-26
FCER2	0.0336918	0.29326	3.12171	3.48681e-10	5.60686e-09
PLA2G2A	2.14611	8.92721	2.05649	3.19833e-05	0.000224188
MYCN	0.345829	0.825448	1.25512	0.000144557	0.000816156
KRT20	1.24562	0.289512	-2.10517	0.0193564	0.0462637
MX1	16.1904	36.4971	1.17265	4.34348e-12	8.22341e-11
CLEC10A	0.288373	1.91738	2.73313	1.30213e-27	8.40604e-26
CCL24	1.47905	3.86143	1.38446	1.9182e-07	2.21515e-06
GSTM3	24.3653	10.1094	-1.26914	7.31032e-05	0.000455699
LILRA1	0.0635624	0.251124	1.98216	3.35519e-24	1.54713e-22
PTGFR	0.177512	0.485074	1.45029	1.24143e-06	1.21968e-05
CAPN6	0.324629	1.25676	1.95284	0.000311759	0.00156399
TLR4	0.674595	1.717	1.34779	3.92033e-18	1.13775e-16
MLXIPL	0.75386	0.284831	-1.40419	2.53139e-05	0.000182302
EBI3	0.83274	1.97081	1.24285	5.52612e-19	1.70076e-17
TENT5C	1.02606	4.20347	2.03446	2.79217e-17	7.74665e-16
ZC3H12D	0.0881949	0.388619	2.13959	3.71503e-29	2.84189e-27
ITGB7	0.476631	1.16353	1.28757	1.46862e-14	3.36841e-13
GBP1	8.22856	39.3304	2.25693	1.14979e-24	5.47351e-23
CXCR4	6.26329	21.402	1.77275	3.95019e-18	1.14391e-16
TMPRSS3	0.265313	0.560556	1.07916	5.95869e-14	1.30128e-12
FCMR	1.4008	3.42193	1.28856	1.70329e-14	3.89988e-13
LILRA4	0.0443952	0.519689	3.54917	1.23726e-26	7.21316e-25
KIR2DL4	0.0882446	0.607375	2.78301	6.45127e-22	2.48186e-20
RAB3B	1.65494	0.812187	-1.0269	3.57444e-05	0.000247148
TNFRSF9	0.277221	1.13984	2.03973	1.86556e-27	1.18129e-25
CD8B	0.366703	1.69113	2.2053	1.48074e-29	1.19489e-27
CD7	0.88914	5.82077	2.71073	9.04057e-36	4.51099e-33
KIAA1257	0.363845	0.127026	-1.5182	8.00082e-05	0.000492021
ACSBG1	0.15836	0.0639596	-1.30797	0.0110136	0.0295707
CYTIP	0.749768	3.69927	2.30273	5.23313e-32	6.85695e-30
CYP26A1	4.6631	1.80564	-1.36878	0.00263466	0.00936282
CCL23	0.102075	0.304428	1.57647	1.32256e-12	2.60459e-11
FAM129C	0.0240175	0.119825	2.31877	4.31647e-12	8.18511e-11
MEI1	0.60801	1.74125	1.51795	9.88671e-20	3.20688e-18
SULT4A1	0.639177	0.283661	-1.17205	4.30538e-05	0.000289487
CD180	0.128283	0.753037	2.5534	5.19018e-31	5.63007e-29
FMNL1	1.44087	4.26248	1.56475	2.80069e-26	1.55733e-24
NXPE4	0.00804642	0.0312159	1.95586	0.0011888	0.00483039
VSIG4	1.00499	5.65118	2.49137	4.94061e-22	1.91181e-20
SELL	0.879254	4.99614	2.50646	1.16144e-25	5.95755e-24
GPR141	0.0622564	0.309135	2.31194	1.34188e-24	6.36502e-23
KEL	0.0782855	0.623342	2.99321	0.00272898	0.00961644
NCKAP1L	0.411204	2.59182	2.65604	9.33948e-36	4.51099e-33
UGT1A10	3.515	0.673345	-2.38411	7.29868e-06	6.05965e-05
CSF1	2.94961	8.43219	1.51538	2.36015e-25	1.19672e-23
BST1	0.368409	0.760044	1.04477	5.40706e-12	1.01788e-10
MUC21	2.91251	7.28232	1.32213	0.0151385	0.0380158
APLNR	2.0464	4.2217	1.04474	2.9614e-08	3.86501e-07
TAGAP	0.471801	2.1645	2.19778	5.76623e-27	3.50047e-25
FGF19	3.41289	1.19552	-1.51335	0.0126854	0.0329561
VGF	0.956789	0.350458	-1.44896	2.50948e-06	2.32079e-05
CDH17	0.0846682	0.19131	1.17602	8.77659e-10	1.37292e-08
HS3ST4	0.174662	0.399186	1.19249	0.0210565	0.0496104
C2	1.20765	3.93082	1.70262	5.14329e-26	2.77822e-24
SIRPG	0.166218	1.78941	3.42834	5.25196e-36	4.0885e-33
SIGLEC12	0.187141	1.11866	2.57957	3.24199e-18	9.47119e-17
GZMK	0.16774	2.33652	3.80006	4.2211e-31	4.69429e-29
FERMT3	1.88547	8.56973	2.18433	1.66218e-33	3.28318e-31
FREM2	1.35326	0.415133	-1.7048	0.000707969	0.00313773
ITM2A	1.29372	4.43861	1.77858	1.11382e-21	4.23572e-20
HSD11B1	0.49119	1.23597	1.33129	1.11842e-07	1.34434e-06
SUSD3	1.29714	3.06937	1.24261	6.0307e-15	1.41008e-13
BTLA	0.0379876	0.253091	2.73605	1.43766e-26	8.27218e-25
GMFG	2.61543	9.00367	1.78347	4.972e-32	6.57994e-30
CIITA	0.450175	2.32793	2.37049	3.91636e-33	7.29988e-31
CFH	4.25978	9.54707	1.16428	4.65944e-16	1.18583e-14
RSAD2	3.96897	14.4959	1.86881	1.47937e-16	3.89224e-15
SLAMF9	3.17381	1.39142	-1.18966	0.000877051	0.00372973
PRRG3	0.07432	0.287795	1.95322	0.000449006	0.00213515
SRXN1	3.45506	1.67497	-1.04457	5.28998e-07	5.58275e-06
PDIA2	3.80171	0.739161	-2.36269	0.00306971	0.01053
HAVCR2	0.780871	3.93315	2.33253	3.33953e-35	1.19447e-32
CPXM1	5.45046	11.5269	1.08055	4.11453e-06	3.61805e-05
DBX2	0.019576	0.126593	2.69304	0.00096135	0.00404017
FOXH1	0.432807	0.167713	-1.36773	1.57396e-05	0.000120334
NLRC3	0.267646	0.809843	1.59732	9.50188e-20	3.09724e-18
IGSF21	0.198954	0.531533	1.41772	3.91314e-15	9.36464e-14
CSF2RB	1.17147	5.26691	2.16864	2.19844e-23	9.26567e-22
LILRB4	0.460999	3.11199	2.755	5.02423e-29	3.8213e-27
CXCL10	7.1711	145.854	4.34618	3.67898e-29	2.83068e-27
TLR1	0.831788	1.77547	1.09391	1.4405e-11	2.64772e-10
IL36B	2.12387	0.866398	-1.29359	0.00134333	0.00533953
SLC10A4	0.744127	0.314703	-1.24156	0.00562767	0.01724
PRRX1	5.00957	10.7997	1.10823	8.61169e-09	1.20473e-07
RUNX1T1	0.0888566	0.178979	1.01024	2.63571e-09	3.93691e-08
TLR3	0.543277	1.69586	1.64226	1.92931e-18	5.73763e-17
DOCK10	0.468655	1.48016	1.65915	8.16035e-23	3.28249e-21
DNASE2B	0.0202634	0.119004	2.55407	8.517e-06	6.96625e-05
ANGPTL1	0.165607	0.4679	1.49843	3.87985e-08	4.98028e-07
FGD2	0.237136	0.815712	1.78234	2.87935e-26	1.58772e-24
CGNL1	0.492199	1.0411	1.0808	2.00273e-05	0.000148649
DOCK8	0.507871	1.78205	1.811	5.87518e-27	3.53419e-25
EVI2B	0.92653	5.5431	2.58078	8.57529e-34	1.83041e-31
LAIR2	0.15308	0.512943	1.74451	3.66418e-17	1.00605e-15
AKR1C3	69.5239	20.5637	-1.75741	1.55026e-08	2.10422e-07
LINGO3	0.0441227	0.115554	1.38898	1.13884e-14	2.62567e-13
GDPD2	8.48782	4.01932	-1.07844	0.00767319	0.022085
PDCD1	0.21063	1.81376	3.1062	4.18499e-35	1.42011e-32
IFI30	0.240396	0.57147	1.24926	2.11132e-19	6.63686e-18
BATF2	1.31689	6.84129	2.37714	1.14327e-17	3.25378e-16
FAM92B	0.108055	0.223843	1.05072	2.27326e-08	3.00843e-07
SIRPB2	0.231701	0.527614	1.18721	5.72491e-16	1.44587e-14
DUSP9	6.2436	2.76589	-1.17464	8.89775e-10	1.39023e-08
IL2RG	2.55852	15.2408	2.57455	1.92806e-31	2.25805e-29
SLC29A4	2.21008	1.05814	-1.06257	0.000146585	0.00082549
DIO3	0.254455	0.660849	1.37691	2.89542e-06	2.64627e-05
ABI3BP	0.36519	1.1196	1.61626	4.24707e-09	6.18325e-08
GPR174	0.0384894	0.484363	3.65356	1.52473e-26	8.66018e-25
SLC30A3	0.52807	0.135772	-1.95954	0.00358984	0.0119462
GZMM	0.432706	1.9814	2.19506	1.71344e-27	1.09017e-25
OLFML2B	7.3537	15.1359	1.04144	6.62973e-09	9.38372e-08
2021-03-01	0.392332	0.850656	1.1165	4.33876e-15	1.03086e-13
ICOS	0.269144	1.63062	2.59897	4.25676e-33	7.82417e-31
GPR84	0.255472	0.925831	1.85758	4.31559e-24	1.97621e-22
COL23A1	0.670734	1.49496	1.15629	2.06558e-05	0.000152374
WISP2	0.36384	0.96939	1.41377	2.26662e-06	2.12289e-05
RGS1	3.0055	12.0186	1.99959	4.71343e-24	2.15095e-22
KLRC2	0.029569	0.184619	2.64239	3.65103e-16	9.32775e-15
KRT84	0.361257	1.32764	1.87777	0.0138599	0.0353823
IL18RAP	0.0970005	0.439057	2.17834	5.4156e-25	2.66432e-23
THEMIS2	2.55695	6.25082	1.28962	1.91604e-22	7.54668e-21
EPSTI1	3.4403	12.2345	1.83035	1.39411e-20	4.80461e-19
MPPED1	0.677764	0.322245	-1.07262	0.000549897	0.00254185
CD300E	0.338536	1.09735	1.69665	1.40433e-13	2.97834e-12
KCNA2	0.0117333	0.160327	3.77234	9.09747e-11	1.56358e-09
ABI3	1.23253	5.38165	2.12642	3.54809e-36	3.26994e-33
APOL1	64.9259	129.879	1.0003	1.02981e-09	1.59212e-08
PATL2	0.11156	0.248572	1.15584	4.2533e-14	9.44433e-13
OASL	8.51207	18.6007	1.12777	7.69464e-09	1.07986e-07
RHOXF1	0.0398953	0.197889	2.3104	0.00286293	0.00997273
MGAT4A	0.643374	1.37456	1.09524	3.45913e-17	9.51729e-16
RTP4	4.56049	10.9692	1.26619	4.32831e-13	8.86701e-12
CCR1	0.640997	3.46577	2.43479	1.71101e-30	1.65281e-28
PEG10	6.14299	2.14968	-1.51482	0.00160698	0.00620564
TXNRD1	38.9698	18.0819	-1.10781	0.000151244	0.000846329
CYP27A1	2.14478	7.61268	1.82757	5.99429e-12	1.12523e-10
RASGRP4	0.12249	0.400304	1.70843	1.03989e-28	7.39887e-27
TXK	0.0789012	0.200126	1.34279	7.34747e-13	1.47776e-11
HSH2D	0.598113	2.28772	1.93542	1.63373e-21	6.07326e-20
NKG7	1.08027	13.9459	3.69038	2.05465e-36	2.26594e-33
TYMP	66.8441	154.83	1.21181	5.6606e-17	1.51952e-15
CD27	0.600333	5.42745	3.17644	2.553e-33	4.89658e-31
FCRLA	0.176546	0.668378	1.92062	1.71535e-12	3.34329e-11
PDGFRL	1.50378	3.30313	1.13524	6.94713e-07	7.18268e-06
CD274	1.56902	5.05774	1.68863	1.20475e-17	3.41407e-16
FAM78A	0.526379	1.6362	1.63618	2.75294e-25	1.39055e-23
SLC6A14	3.38048	7.26356	1.10345	0.000202678	0.00108814
HLA-DPA1	6.99609	44.3834	2.6654	2.30204e-32	3.38503e-30
GLIPR2	3.9291	8.04078	1.03314	3.10289e-16	7.95806e-15
SAMSN1	0.77204	2.94906	1.93351	2.06799e-30	1.96891e-28
GRIN2A	0.0494693	0.21381	2.11172	0.00165442	0.00635833
C1GALT1C1L	0.822685	0.405752	-1.01974	1.70691e-06	1.63454e-05
BTK	0.303459	1.2639	2.05831	5.86479e-30	5.20903e-28
SPATA46	0.205708	0.0919091	-1.16232	6.72503e-05	0.000424614
C1QC	15.1365	98.3488	2.69988	2.4705e-35	9.75265e-33
OGN	0.438042	0.940426	1.10225	1.91896e-05	0.000142993
LSAMP	0.344069	1.05668	1.61876	4.24172e-07	4.60122e-06
CD69	0.400241	1.83652	2.19803	9.70197e-25	4.65202e-23
IL18BP	1.20769	4.0165	1.73369	1.11939e-24	5.34801e-23
LOR	7.71551	3.61022	-1.09568	0.00763362	0.0219958
P2RY13	0.17796	1.14295	2.68314	1.36528e-27	8.77092e-26
C1orf162	0.76807	2.75237	1.84136	6.38624e-33	1.12687e-30
ZNF366	0.158643	0.424594	1.4203	4.42758e-09	6.41079e-08
MX2	2.89667	5.93303	1.03437	2.00138e-09	3.01323e-08
CCL4L2	0.830725	3.22314	1.95602	1.53668e-20	5.28219e-19
P2RY8	0.277934	1.40238	2.33506	8.13379e-26	4.3057e-24
AIM2	4.9669	12.7251	1.35726	5.58677e-11	9.81876e-10
PIM2	4.92205	13.5238	1.45817	1.65265e-12	3.22584e-11
TBXAS1	0.601284	1.63494	1.44312	7.96726e-25	3.87642e-23
ABCA6	0.0700379	0.168167	1.26369	2.972e-12	5.70021e-11
RIPOR2	0.353357	0.851715	1.26924	4.82362e-14	1.06571e-12
SLC7A7	0.707407	3.03192	2.09962	2.84375e-30	2.63176e-28
PROK2	0.14741	0.367507	1.31793	0.00253224	0.00906946
HAND2	0.127257	0.258995	1.02517	0.00214791	0.00789157
FCRL2	0.0127263	0.125781	3.30504	1.38915e-14	3.19166e-13
ELN	2.53641	6.00135	1.2425	1.84629e-05	0.000138514
LILRB3	0.17483	0.600124	1.77931	1.99308e-27	1.25602e-25
FBLN5	2.07059	4.25747	1.03996	4.18006e-11	7.43533e-10
CTLA4	0.871443	2.39894	1.46092	4.58085e-32	6.24979e-30
TPSB2	2.70205	6.7556	1.32203	1.08302e-08	1.49923e-07
FYB1	1.92331	6.29126	1.70976	6.20939e-19	1.9022e-17
C5AR1	1.84903	5.35605	1.5344	1.9515e-19	6.14907e-18
GIMAP7	1.37798	5.69772	2.04783	2.04141e-25	1.04309e-23
THEMIS	0.197394	0.429941	1.12306	5.94238e-21	2.11402e-19
BANK1	0.243978	0.491169	1.00947	0.000214768	0.00114284
HLA-DQA1	3.08991	18.7228	2.59916	3.29677e-31	3.69741e-29
JAML	0.290289	2.92132	3.33106	1.31891e-32	2.1507e-30
TIFAB	0.0256113	0.215798	3.07482	9.88784e-28	6.4461e-26
RNASE1	19.2168	51.4834	1.42174	7.20998e-22	2.75772e-20
CLLU1OS	0.109557	0.272851	1.31643	0.000748311	0.00328245
SELPLG	2.01862	9.64757	2.2568	6.7399e-38	4.45979e-34
AGTR1	0.060889	0.133023	1.12742	0.000100228	0.000595971
SEC14L6	0.0437697	0.0881366	1.00981	3.02657e-07	3.35738e-06
LTF	6.44699	41.1266	2.67337	1.9873e-05	0.00014767
FCRL5	0.0576694	0.468569	3.02238	6.52359e-16	1.64444e-14
UBD	1.73042	12.5597	2.85961	4.13613e-23	1.71055e-21
LCP2	0.784888	3.51006	2.16094	1.99291e-32	2.99707e-30
TMIGD3	0.259556	0.800467	1.6248	1.92887e-21	7.13035e-20
RHEX	0.646975	2.09149	1.69275	1.69118e-11	3.0913e-10
HLA-DQA2	3.99502	19.0393	2.25271	9.36797e-17	2.49448e-15
CMA1	0.136493	0.449173	1.71845	0.000159301	0.000884681
AADACL2	0.667981	0.25917	-1.36591	0.000466817	0.00221031
IFI44L	2.33781	6.00819	1.36177	3.98032e-14	8.86795e-13
CD300LF	0.283575	1.47152	2.37551	2.799e-32	3.98301e-30
ADGRE3	0.052257	0.147865	1.50058	6.56117e-09	9.3066e-08
LRMP	0.473422	1.34834	1.50999	6.73765e-16	1.69517e-14
KLRG1	0.091549	0.250713	1.45342	1.98806e-14	4.51286e-13
DLL3	0.697237	0.300367	-1.21492	4.24507e-05	0.000285788
KL	0.0912353	0.234675	1.363	7.88503e-06	6.50564e-05
WDFY4	0.13099	0.83272	2.66837	1.01917e-29	8.59086e-28
RSPO3	0.159267	0.449887	1.49811	1.58214e-12	3.09308e-11
ZAP70	0.621286	1.53499	1.3049	1.81791e-19	5.75557e-18
TRAT1	0.0358969	0.498526	3.79574	1.22848e-29	1.01611e-27
MS4A4A	0.73189	3.46233	2.24205	4.69234e-27	2.86168e-25
HOXA13	0.469111	0.215531	-1.12203	0.00302547	0.010416
SMTNL1	0.450369	1.59541	1.82475	1.7349e-05	0.000131355
XAF1	1.51129	3.34538	1.14639	7.49622e-11	1.29849e-09
APBB1IP	0.507323	2.27593	2.16548	5.41858e-30	4.84523e-28
TNFRSF4	1.05314	3.62152	1.7819	1.64258e-24	7.68122e-23
FGF13	0.39508	0.183913	-1.10312	0.00356036	0.0118745
AKNA	1.31205	3.4334	1.38781	1.32684e-23	5.68266e-22
MFAP4	4.91785	13.1573	1.41977	4.60111e-07	4.93445e-06
APOBEC3G	1.52583	3.98544	1.38514	7.92648e-16	1.97179e-14
APOL3	1.88902	8.37678	2.14876	2.04275e-28	1.41538e-26
SAMD3	0.0175959	0.120609	2.77703	1.6174e-29	1.28944e-27
GPR65	0.128154	0.664144	2.37361	1.43188e-34	3.57537e-32
FGF10	0.0379845	0.154568	2.02476	1.69891e-06	1.62805e-05
ISG20	2.13105	5.82244	1.45006	1.70679e-19	5.42971e-18
TRAF1	1.2979	3.16834	1.28755	7.33415e-16	1.83478e-14
FBXL13	0.285697	0.124379	-1.19974	0.00900811	0.0251558
PARP15	0.0933328	0.34728	1.89564	1.02056e-19	3.30223e-18
RETN	0.144166	0.355294	1.30128	7.95716e-05	0.000490019
FCGR3B	0.306766	0.848878	1.46842	1.10265e-07	1.329e-06
C1QA	13.7176	100.435	2.87216	8.56337e-36	4.51099e-33
TRIL	0.45982	0.920278	1.001	2.54384e-07	2.86025e-06
TMEM273	0.334084	1.02476	1.61701	1.13009e-25	5.81931e-24
PLEKHS1	0.220582	0.55368	1.32774	0.00546203	0.0168477
RUFY4	0.0496742	0.349624	2.81524	1.59924e-24	7.53181e-23
AR	0.128667	0.305405	1.24708	5.79115e-06	4.91913e-05
IL9R	0.0549272	0.286297	2.38192	8.45639e-24	3.74287e-22
ABCC2	0.643568	0.319893	-1.0085	0.000645256	0.00289763
ACKR1	1.84964	5.1773	1.48495	2.23308e-08	2.96415e-07
FXYD2	0.032999	0.448493	3.76459	2.57829e-08	3.38559e-07
CDH23	0.160694	0.344537	1.10034	6.05045e-05	0.000388698
SLA2	0.207681	1.64725	2.98762	9.54419e-36	4.51099e-33
LYG2	0.219506	0.0998098	-1.137	0.00440753	0.014201
RIMKLA	0.36221	0.121305	-1.57819	0.000186028	0.00101229
PSMB10	8.43913	21.9748	1.38068	2.0334e-24	9.4421e-23
CEND1	0.289205	0.603266	1.0607	0.0122847	0.0321296
MMP25	0.520803	1.28704	1.30525	1.37614e-16	3.64238e-15
AOAH	1.22802	2.58829	1.07566	4.05756e-21	1.47521e-19
CD209	0.381084	2.09986	2.46211	3.16293e-27	1.96518e-25
SAMD9L	2.48028	7.05416	1.50797	6.50797e-18	1.86825e-16
SLFN12L	0.0992188	0.312143	1.65352	1.52963e-24	7.22967e-23
CRB2	0.0376065	0.298079	2.98664	0.0082721	0.0235021
RAB37	0.181071	0.403687	1.15668	5.85074e-12	1.09984e-10
CCDC170	0.0860389	0.227644	1.40372	4.49367e-18	1.29562e-16
TIMD4	0.028564	0.186046	2.70339	1.51161e-15	3.71143e-14
CCL19	1.86975	24.6806	3.72246	3.14279e-21	1.14577e-19
ENPP3	0.0469665	0.109939	1.22699	4.21782e-09	6.14742e-08
ZNF683	0.0877197	1.20139	3.77566	2.11812e-29	1.66852e-27
PTGIS	0.394581	1.30763	1.72856	1.57692e-07	1.84681e-06
MS4A2	0.099614	0.282369	1.50316	3.27588e-10	5.28696e-09
GFY	1.80789	0.120421	-3.90815	0.00174065	0.00661188
IL15RA	3.08361	6.31696	1.03461	1.49787e-18	4.4848e-17
SMKR1	1.5684	0.764883	-1.03599	0.000691686	0.0030738
TIGIT	0.222795	1.58754	2.83301	7.46572e-35	2.05836e-32
CD3E	0.952418	7.57873	2.99229	4.86757e-37	9.20249e-34
FAM181A	0.275075	0.116758	-1.2363	0.00110733	0.00454305
PTGER1	0.613692	0.178219	-1.78386	0.000962853	0.0040452
VWA3B	0.0248739	0.0503595	1.01763	3.37309e-09	4.95995e-08
HVCN1	0.531522	1.37103	1.36706	4.1284e-16	1.0527e-14
BIN2	0.681189	1.9248	1.49858	1.46475e-26	8.39157e-25
ZBP1	0.157046	1.14253	2.86297	1.27798e-29	1.05048e-27
ADGRG5	0.233391	0.597259	1.35561	5.26053e-17	1.415e-15
GZMA	1.4681	13.9754	3.25087	9.87129e-31	1.02864e-28
JAK2	1.43664	3.72507	1.37456	1.61742e-18	4.83181e-17
BCL2L14	0.0955031	0.372847	1.96496	2.06042e-17	5.75266e-16
SIT1	0.66169	2.29837	1.79638	8.53523e-30	7.33475e-28
FAM20A	1.46571	3.16512	1.11066	2.51425e-15	6.07182e-14
FGL2	0.875671	6.14742	2.81152	2.5158e-34	5.84107e-32
CCL8	0.52455	2.33782	2.15601	9.80853e-20	3.18934e-18
JAKMIP1	0.0489729	0.384258	2.97202	1.58985e-31	1.91273e-29
RASSF2	1.04352	3.51198	1.75082	2.20246e-21	8.07405e-20
NLRP3	0.339477	0.985441	1.53746	3.86126e-18	1.12308e-16
C4B	0.133676	0.442828	1.728	2.1947e-13	4.57396e-12
GPR132	0.766673	1.55813	1.02313	1.84646e-14	4.20585e-13
CALB1	9.22019	3.57149	-1.36827	0.0101099	0.0276324
CCRL2	0.228668	0.824156	1.84966	1.62257e-31	1.93452e-29
RHOH	0.222523	1.0182	2.19399	2.92984e-30	2.6926e-28
TFR2	1.0413	0.458962	-1.18194	7.525e-07	7.72582e-06
GPRIN3	0.164623	0.69311	2.07391	2.00382e-28	1.39571e-26
OSCAR	1.1221	2.41247	1.10431	5.03835e-16	1.27735e-14
LRRC15	3.81659	9.16157	1.26331	9.05901e-07	9.11688e-06
IL12RB1	0.233918	1.64393	2.81308	1.62195e-35	6.70777e-33
IGF2BP1	2.22837	0.99687	-1.16051	0.000130626	0.000748381
SFRP4	4.7995	13.7988	1.52359	0.000365597	0.00179064
SELE	0.996369	3.32136	1.73702	2.96022e-07	3.29761e-06
ABCB1	0.124627	0.385208	1.62802	4.49051e-15	1.0631e-13
IL18R1	0.560638	1.16754	1.05833	5.1194e-14	1.12917e-12
GPSM3	3.32729	10.5705	1.66762	3.46887e-30	3.12292e-28
TACR1	0.0760959	0.188543	1.309	0.000438992	0.00209468
CMKLR1	0.538791	2.29004	2.08757	7.56197e-27	4.48768e-25
PLEK	1.5149	8.56104	2.49857	9.16975e-29	6.59524e-27
PDCD1LG2	1.00243	3.77876	1.9144	2.50986e-19	7.83384e-18
GIMAP5	0.0391823	0.167034	2.09187	1.14377e-23	4.97915e-22
BATF3	0.441622	0.933853	1.08038	7.02467e-14	1.52902e-12
ITK	0.0810629	0.680592	3.06968	3.01298e-34	6.87479e-32
CADM3	0.404015	0.926252	1.197	6.32693e-07	6.57226e-06
CYP4F11	21.8719	7.17359	-1.60831	3.09909e-10	5.01386e-09
ARG2	6.42999	3.16968	-1.02048	3.37985e-07	3.71503e-06
TVP23A	0.0752635	0.172909	1.19999	1.82386e-16	4.77015e-15
SLC13A5	1.98182	0.714605	-1.47161	0.00133993	0.00532993
TPSD1	0.323785	0.747237	1.20653	2.8408e-05	0.000201475
APOL4	1.84409	4.92347	1.41676	2.67702e-12	5.14937e-11
LGALS2	0.775025	3.52192	2.18405	9.19479e-25	4.42488e-23
FABP9	0.132704	0.0552571	-1.26398	0.00209998	0.00774774
ABHD12B	0.74254	0.287738	-1.36771	0.000155503	0.000866496
GPX2	211.979	82.362	-1.36387	2.11411e-08	2.8147e-07
TTC24	0.0281971	0.122506	2.11923	3.38841e-17	9.34213e-16
MGST1	10.3397	4.94393	-1.06447	0.000649354	0.00291307
NCR1	0.0278305	0.177404	2.6723	5.04419e-23	2.07313e-21
IFIT3	12.9236	49.0053	1.92293	1.20475e-17	3.41407e-16
CD79B	0.453535	2.38605	2.39534	3.61039e-25	1.79624e-23
PQLC2L	0.567901	0.178346	-1.67096	0.0101088	0.0276324
SPN	0.272376	1.84856	2.76273	1.23905e-33	2.52271e-31
IGLL5	3.47243	32.428	3.22323	1.41655e-16	3.74184e-15
IL22RA2	0.179211	0.500462	1.48161	4.36222e-08	5.56162e-07
RND2	1.05085	0.493851	-1.08942	3.49807e-06	3.1428e-05
CPA3	2.42198	5.97474	1.30269	1.81099e-08	2.42578e-07
ITGAX	0.971624	3.09296	1.67052	1.43018e-21	5.34662e-20
CHP2	3.87292	1.66722	-1.21598	4.56702e-05	0.000303871
TMEM229B	0.873342	2.41782	1.46908	1.58825e-15	3.88519e-14
ALDH3A1	133.305	52.8055	-1.33598	3.32775e-05	0.000231909
TMEM26	0.0943766	0.198575	1.07318	8.29152e-10	1.30166e-08
KCNJ5	0.292889	0.74956	1.35569	2.21668e-10	3.6578e-09
C1QTNF2	0.405215	0.903267	1.15647	6.57894e-13	1.32722e-11
KIF25	0.0261162	0.131529	2.33237	3.58102e-05	0.000247474
COMP	3.61228	8.22737	1.18752	1.73499e-05	0.000131355
PPP1R1B	3.29441	1.05367	-1.6446	0.0138258	0.0353157
GHRL	0.0736762	0.175665	1.25355	9.5356e-11	1.63042e-09
WAS	1.13437	4.82905	2.08985	1.10859e-34	2.93421e-32
OAS3	16.8539	33.9256	1.00929	1.44537e-09	2.20877e-08
LYZ	16.8571	129.518	2.94172	1.64258e-24	7.68122e-23
TLR8	0.0939565	0.81079	3.10926	2.91649e-32	4.10604e-30
VAV1	0.969362	2.48894	1.36042	4.34756e-20	1.44926e-18
CLDN8	3.28418	1.09694	-1.58204	0.00339613	0.0114172
FCGR2B	0.175124	0.74061	2.08034	3.26823e-30	2.96244e-28
MPEG1	0.932923	6.44671	2.78873	4.46347e-35	1.44072e-32
TNFSF13B	0.701006	3.25679	2.21595	1.46245e-32	2.33181e-30
SCIMP	0.0904877	0.692213	2.93542	1.90969e-28	1.33719e-26
FOXP3	0.878999	3.93974	2.16417	2.13075e-30	2.01417e-28
TPSAB1	3.24502	6.81496	1.07048	1.08811e-11	2.01964e-10
FOLR2	1.48239	6.14932	2.0525	1.27312e-22	5.09018e-21
CR2	0.182669	0.427627	1.22712	0.000202062	0.00108571
FUT7	0.0946575	0.604416	2.67475	1.50846e-32	2.37655e-30
SCT	1.17483	2.4909	1.08422	0.00144788	0.00567741
GCLC	24.6395	11.2857	-1.12647	1.68042e-06	1.61383e-05
STAB1	1.64343	5.22365	1.66835	1.27386e-28	9.01509e-27
TRANK1	1.14401	3.18336	1.47646	2.19844e-23	9.26567e-22
CXCL9	2.82677	57.9162	4.35674	1.47299e-30	1.44397e-28
APOL6	3.72233	12.1021	1.70098	4.86745e-26	2.66181e-24
CCL25	0.0206371	0.164763	2.99708	1.18172e-08	1.62566e-07
TAP1	32.5911	81.7277	1.32635	3.77431e-18	1.1002e-16
LRRC25	0.515438	2.44307	2.24482	7.63863e-32	9.62758e-30
PTPRC	0.726427	5.56734	2.9381	6.19029e-33	1.10706e-30
CXorf21	0.195924	1.03274	2.39811	4.87121e-32	6.57812e-30
IFI6	260.78	537.509	1.04345	4.26925e-09	6.20871e-08
CD96	0.272356	1.43366	2.39613	1.08035e-31	1.32383e-29
PTPN22	0.304832	1.09316	1.84243	4.52339e-25	2.23368e-23
ADARB2	0.0893161	0.265059	1.56932	0.000114264	0.000668215
CCL11	1.21793	3.20559	1.39616	3.8047e-08	4.89323e-07
FAM177B	0.0736351	0.169151	1.19985	8.45671e-12	1.58074e-10
RUBCNL	0.21216	0.687847	1.69693	7.13555e-20	2.35491e-18
KRTAP19-1	1.02197	0.29751	-1.78034	0.000186112	0.00101233
NCR3	0.0875422	0.432179	2.30358	5.28594e-23	2.15908e-21
C1orf68	1.21178	2.61183	1.10793	0.00126193	0.00506838
VNN2	0.248299	0.924312	1.8963	7.23124e-16	1.81247e-14
CTSO	3.78548	8.15093	1.10649	3.69643e-17	1.01281e-15
CST7	1.71385	9.15432	2.41721	5.83605e-35	1.79615e-32
CD84	0.189073	1.30656	2.78876	1.08026e-30	1.11689e-28
CPVL	2.70489	6.10723	1.17495	6.64943e-17	1.78135e-15
MAP4K1	0.803162	2.33313	1.5385	6.03249e-25	2.9459e-23
MNDA	0.815922	4.34589	2.41315	1.14116e-32	1.88776e-30
CYSLTR2	0.119219	0.362628	1.60488	6.40527e-19	1.95768e-17
SLC8A2	0.647151	0.205761	-1.65313	0.00292805	0.0101492
TCHH	6.89938	2.1349	-1.6923	7.83103e-07	8.00895e-06
PSMB9	11.5474	35.37	1.61496	1.3151e-19	4.21407e-18
CYP1A1	0.622622	0.284023	-1.13235	0.0122581	0.0320726
PIK3CG	0.140353	0.80214	2.51479	7.51234e-24	3.34742e-22
HES7	0.384602	0.151133	-1.34755	0.000346671	0.00170879
SNCB	0.975703	0.29537	-1.72392	9.79185e-08	1.18795e-06
PLCB2	0.623416	1.48136	1.24865	1.63373e-21	6.07326e-20
KLRF1	0.117818	0.261547	1.15051	1.0639e-11	1.98026e-10
VCAM1	0.834664	8.17078	3.29121	1.79243e-20	6.12946e-19
P2RY10	0.127601	1.07453	3.074	5.51314e-31	5.93178e-29
ADH1B	0.0365025	0.176716	2.27537	0.000301969	0.0015218
CSF3R	0.291134	1.0652	1.87137	6.58532e-21	2.324e-19
KIAA1755	0.215781	0.489074	1.18049	3.44414e-10	5.54499e-09
TFEC	0.0800409	0.460492	2.52437	1.58624e-29	1.27226e-27
CD300LB	0.0826352	0.310536	1.90993	1.43018e-21	5.34662e-20
JAKMIP3	0.527979	0.144183	-1.87258	1.00093e-05	8.04761e-05
OR2I1P	1.98857	10.7528	2.43491	1.18905e-22	4.76844e-21
RARRES3	9.63801	31.5248	1.70968	1.14421e-18	3.4493e-17
CTSS	4.15524	19.9546	2.26372	2.23957e-30	2.10202e-28
UBE2L6	37.9231	80.5184	1.08624	1.31495e-15	3.2406e-14
BTBD16	1.23633	0.432822	-1.51422	3.45447e-06	3.10574e-05
FCGR1A	0.163101	0.977799	2.58377	1.80198e-29	1.42799e-27
SPINK1	0.827031	0.341404	-1.27646	0.000337888	0.00166976
SPDYC	2.88618	1.14012	-1.33998	0.00180569	0.00682171
MGP	9.11637	19.0495	1.06322	2.87502e-08	3.75598e-07
PAX1	0.156748	2.22904	3.82991	0.0112975	0.0301507
AKR1C1	60.8114	18.0853	-1.74952	2.41807e-07	2.73511e-06
RASAL3	0.60552	2.33521	1.94731	1.49595e-31	1.81628e-29
ACAP1	0.821892	1.9836	1.2711	2.70603e-20	9.18246e-19
CD14	10.0782	42.7427	2.08445	1.30092e-34	3.37577e-32
ATP6V0D2	0.197672	0.486287	1.2987	3.07975e-05	0.000216565
AC119396.1	0.0558955	0.156789	1.48802	2.81365e-05	0.000200085
OSGIN1	10.5573	5.25579	-1.00626	3.66859e-07	4.01573e-06
EPCAM	54.5478	24.4073	-1.16021	4.06363e-06	3.57567e-05
GAST	10.4446	4.35982	-1.26042	7.51046e-06	6.21987e-05
CLEC1A	0.357994	1.06116	1.56763	2.71194e-11	4.89629e-10
LILRA2	0.0764512	0.249453	1.70616	1.33999e-22	5.30942e-21
CD8A	0.381449	4.67139	3.61429	2.10021e-34	5.05349e-32
CYSLTR1	0.120936	0.373993	1.62877	7.53824e-19	2.29336e-17
LY9	0.079846	0.306007	1.93827	1.88007e-23	8.00026e-22
P2RY14	0.128473	0.425249	1.72684	1.0755e-16	2.85233e-15
TMEM156	0.231615	0.600624	1.37473	2.90932e-16	7.47611e-15
ERAP2	3.55705	8.89643	1.32254	1.25774e-06	1.23388e-05
IFIH1	6.71133	16.894	1.33184	5.64429e-16	1.42823e-14
FGF7	0.207226	0.605122	1.54602	3.88296e-07	4.23637e-06
PPP1R1A	0.164292	0.53621	1.70654	0.0115913	0.0307414
PTH2R	0.979529	0.466131	-1.07135	0.000249122	0.00129929
CTSE	0.125205	0.364214	1.5405	0.000177608	0.000972471
ABCA8	0.0911526	0.290753	1.67344	6.18733e-07	6.44749e-06
TNFRSF14	2.43305	5.89249	1.27611	5.14965e-21	1.85191e-19
RIPPLY2	0.914636	0.256215	-1.83584	2.85732e-12	5.48821e-11
TMEM116	2.1102	1.02806	-1.03745	0.00109087	0.00448619
CCDC69	2.48335	5.20901	1.06872	2.71345e-15	6.5172e-14
ENPP2	0.753022	2.4836	1.72167	1.48641e-18	4.46057e-17
CD4	2.35615	11.378	2.27174	4.50748e-31	4.971e-29
TCTEX1D1	0.083944	0.168813	1.00793	5.45877e-07	5.74713e-06
CXCR3	0.207322	2.51489	3.60055	6.22352e-35	1.83027e-32
PRKCB	0.194847	0.864311	2.14921	8.25801e-25	4.00317e-23
DKK2	0.196444	0.401435	1.03105	1.80193e-08	2.41612e-07
SCML4	0.0135726	0.152662	3.49158	5.18413e-31	5.63007e-29
HRNR	0.459529	0.214579	-1.09865	0.000601728	0.00273464
ITGB2	2.99979	14.1998	2.24294	3.40284e-29	2.64901e-27
CFB	1.04867	2.96059	1.49733	1.43719e-16	3.7888e-15
HLA-DRA	91.1182	559.38	2.61802	1.12285e-35	5.12405e-33
PIK3R6	0.179899	0.568639	1.66033	1.86425e-26	1.04985e-24
DMRT1	0.330437	0.104885	-1.65556	0.0113272	0.0302006
CD163L1	0.327444	0.902742	1.46307	1.84646e-14	4.20585e-13
TNFAIP8L2	0.67453	3.39	2.32933	5.18689e-35	1.63437e-32
SLAMF6	0.173501	1.85664	3.41968	6.9269e-35	1.99264e-32
GLI1	2.17998	1.01408	-1.10415	0.00188339	0.00707287
RORB	0.0466842	0.482297	3.36892	1.66711e-08	2.25588e-07
FLI1	0.651906	1.68969	1.37403	1.14205e-21	4.31826e-20
CD300A	0.899239	3.68951	2.03665	1.62149e-32	2.52457e-30
GIMAP1	0.23858	1.0022	2.07063	9.99292e-30	8.47733e-28
CD200R1	0.192132	0.447111	1.21854	9.4818e-11	1.62331e-09
DHH	0.0444911	0.113291	1.34845	1.11609e-07	1.34276e-06
UGT1A6	2.31039	0.909389	-1.34517	2.23919e-07	2.55681e-06
SFTPB	0.0862157	0.278868	1.69356	1.64023e-07	1.91587e-06
CCR5	0.289229	2.75042	3.24937	1.43841e-37	6.34532e-34
CLEC5A	0.47511	1.163	1.29151	2.76705e-16	7.12434e-15
KCNA3	0.0403056	0.42166	3.38703	3.34893e-25	1.67244e-23
GFRA1	0.137554	0.475777	1.79029	1.39962e-09	2.14134e-08
TNFSF15	0.253928	0.646049	1.34723	4.89e-11	8.65164e-10
CXorf65	0.0465854	0.204673	2.13537	1.981e-21	7.30268e-20
CCR7	1.47165	3.11248	1.08063	2.29558e-21	8.39218e-20
ICAM3	0.259839	0.884941	1.76797	9.35301e-24	4.11223e-22
CD1C	0.525894	1.40843	1.42124	5.13894e-13	1.0479e-11
CCL18	5.7962	27.0957	2.22489	7.49122e-16	1.86702e-14
GNLY	2.46364	8.89127	1.8516	1.78904e-17	5.02679e-16
UGT2B7	0.0341862	0.105523	1.62607	0.00694108	0.0203858
IL32	13.1926	32.5988	1.30508	3.2175e-14	7.22928e-13
SERPING1	19.5356	62.6306	1.68077	7.51234e-24	3.34742e-22
DOCK2	0.240033	1.47408	2.61851	2.57795e-32	3.70832e-30
RASGRP2	0.229958	0.61014	1.40777	1.59022e-16	4.16731e-15
HLA-DQB2	4.01469	15.804	1.97692	1.11126e-15	2.74887e-14
ENPP6	0.0443576	0.362144	3.02931	7.00678e-09	9.88569e-08
POU2AF1	0.913084	2.49418	1.44974	5.81205e-07	6.10935e-06
TNFSF4	0.569424	1.71965	1.59454	1.38053e-10	2.32147e-09
TBC1D10C	0.281892	1.80252	2.6768	8.39659e-34	1.82165e-31
DIRAS2	0.524235	0.139384	-1.91115	0.0123509	0.032271
NFATC2	0.800488	1.79227	1.16284	5.15154e-15	1.21093e-13
HAPLN3	4.80768	10.8572	1.17525	1.88548e-18	5.61992e-17
MS4A1	0.0824049	1.18412	3.84494	4.77734e-17	1.29291e-15
BCL2L15	0.0634608	0.149676	1.23791	0.00335889	0.0113198
HLA-DRB5	17.0232	102.537	2.59056	9.67541e-31	1.01622e-28
CFP	0.142051	0.551391	1.95666	3.32383e-22	1.29375e-20
IPCEF1	0.148264	0.307879	1.05419	8.40129e-19	2.55006e-17
ITGA9	0.519752	1.17223	1.17336	8.51958e-13	1.70314e-11
IL10	0.171929	0.467874	1.44431	4.80365e-19	1.48185e-17
NTS	123.536	57.0584	-1.11442	0.0203549	0.0482494
ACP5	18.5142	37.5651	1.02076	5.034e-17	1.35959e-15
IL16	0.297147	1.17676	1.98558	8.33437e-28	5.46025e-26
CCL22	1.86819	4.69819	1.33046	1.00938e-12	1.99972e-11
LAX1	0.139504	1.04638	2.90703	1.04801e-23	4.5925e-22
TMEM139	1.02184	0.334192	-1.61241	0.0160184	0.0397577
HERC6	5.34865	11.6732	1.12596	1.16909e-11	2.16388e-10
LILRB1	0.186437	1.17067	2.65057	2.75146e-35	1.01147e-32
PIK3R5	0.312655	1.13083	1.85473	8.90723e-29	6.44144e-27
SERPINA1	3.4311	10.9211	1.67037	1.80364e-19	5.72408e-18
NKAIN2	0.84017	0.416534	-1.01225	2.36322e-05	0.000171752
RAMP3	3.7259	7.8255	1.07059	5.57835e-14	1.22631e-12
JAK3	1.24823	3.2123	1.36372	4.0678e-17	1.10541e-15
SLC15A3	3.44944	9.37586	1.44259	6.91675e-21	2.43448e-19
FCER1G	6.5361	29.6689	2.18245	5.11458e-34	1.14723e-31
GPR63	0.355599	0.154824	-1.19962	3.83823e-05	0.000262507
KIF1A	0.747031	0.251861	-1.56854	0.00547447	0.0168761
CD226	0.0355818	0.175044	2.29851	3.57291e-29	2.76514e-27
CDK5R2	0.291303	0.0804835	-1.85576	0.00168213	0.00643936
KLRB1	0.22399	1.42332	2.66775	2.80482e-28	1.89383e-26
NYAP1	0.878752	0.239124	-1.8777	4.38185e-09	6.35152e-08
FCN1	0.142933	0.700214	2.29246	2.53893e-16	6.58828e-15
PILRA	0.789242	3.05419	1.95225	5.87518e-27	3.53419e-25
ETV7	1.92202	7.77247	2.01575	2.80654e-22	1.09563e-20
KCNH8	0.223394	0.0898831	-1.31347	0.00271347	0.00957232
2021-09-01	0.664168	2.16748	1.7064	5.14965e-21	1.85191e-19
GIMAP6	0.927029	3.19344	1.78443	6.87361e-23	2.79035e-21
CLEC4G	0.147018	0.497918	1.75991	9.49074e-10	1.47667e-08
CRTAM	0.105981	0.562516	2.40809	5.58631e-26	3.00525e-24
CHI3L1	8.53588	22.9576	1.42736	7.05023e-05	0.000443244
ACE	0.721883	1.45115	1.00736	2.51425e-15	6.07182e-14
CD40LG	0.0434035	0.359624	3.05061	7.0052e-23	2.83507e-21
UPK1A	2.36574	0.994369	-1.25044	0.0106171	0.0287218
CD247	0.571512	1.95521	1.77447	1.16973e-29	9.73602e-28
IGLL1	0.0229047	0.259441	3.50169	7.04851e-10	1.11048e-08
DDC	0.852129	0.11815	-2.85045	0.000204703	0.00109678
GBP4	1.6147	11.5091	2.83344	1.36291e-28	9.59401e-27
CYP2W1	3.29712	1.38326	-1.25313	0.00319895	0.0109054
CCL21	12.8389	37.4782	1.54553	2.20462e-07	2.52387e-06
GPR55	0.0758789	0.243	1.67918	4.05285e-17	1.10361e-15
SLC6A12	0.0850065	0.202221	1.25029	1.35943e-13	2.88776e-12
PNOC	0.148829	0.448826	1.5925	6.15346e-11	1.07576e-09
BATF	1.7759	6.81124	1.93937	1.30335e-29	1.06472e-27
DOK3	0.626889	1.77424	1.50092	1.73101e-26	9.78984e-25
IL10RA	0.609959	3.64941	2.58088	3.61179e-37	9.20249e-34
TRPV2	1.82742	4.24189	1.2149	1.34504e-18	4.0455e-17
ARG1	3.9402	1.36515	-1.52921	0.00596229	0.0180688
SOWAHD	0.214947	0.463529	1.10868	3.32643e-14	7.43614e-13
GGT5	2.809	5.80493	1.04722	2.15268e-13	4.50768e-12
ZMYND15	0.403711	1.00812	1.32028	1.90593e-19	6.01981e-18
GAB3	0.21041	0.645058	1.61623	2.27614e-23	9.56269e-22
FCGR2A	1.94913	6.55928	1.7507	3.86747e-26	2.12374e-24
AKR1C2	75.5133	23.7199	-1.67063	4.85529e-08	6.15469e-07
MIA	0.141394	0.621046	2.13497	0.00975773	0.0268805
GIMAP2	1.04102	2.88261	1.46937	5.636e-21	2.01586e-19
PTCRA	0.0288522	0.200507	2.7969	2.79986e-23	1.1652e-21
HAMP	0.0880567	0.21565	1.29219	2.05749e-13	4.31518e-12
NFAM1	0.373099	1.94047	2.37878	8.24109e-31	8.725e-29
LPXN	3.48846	7.01264	1.00737	3.30913e-16	8.47061e-15
MMRN1	0.264597	0.730068	1.46423	1.14391e-05	9.05417e-05
CRLF2	0.0487622	0.138528	1.50634	9.4214e-14	2.02736e-12
PECAM1	6.24125	12.585	1.0118	2.38639e-13	4.96565e-12
CABYR	2.32912	1.049	-1.15077	4.44819e-08	5.66577e-07
ITGAM	0.820098	2.79988	1.7715	2.02713e-15	4.91338e-14
ARHGAP15	0.122025	0.608137	2.31722	3.32327e-36	3.26994e-33
CTSG	0.468521	1.47912	1.65856	2.30545e-06	2.15469e-05
FPR1	0.895441	3.01186	1.74999	6.51964e-22	2.5009e-20
CD48	0.457401	3.69439	3.01381	4.12427e-37	9.20249e-34
ARHGDIB	19.0029	48.1666	1.34181	1.49221e-26	8.512e-25
RNASE2	0.229319	0.813874	1.82745	7.08341e-19	2.15995e-17
SPOCK2	1.39548	7.1077	2.34862	8.73638e-29	6.3526e-27
EPYC	0.153962	0.851846	2.46802	0.000150893	0.000845437
CES1	91.874	18.9179	-2.27991	0.00104204	0.00431757
HLA-DOA	1.14504	6.5467	2.51537	2.50911e-31	2.86255e-29
PRELP	1.28757	4.09747	1.67008	7.04223e-10	1.11048e-08
PLA2G7	1.26376	5.16199	2.0302	9.37186e-27	5.53693e-25
FOXL2NB	0.383705	0.151064	-1.34484	0.00995419	0.027308
SIGLEC1	0.296772	2.02869	2.77312	2.18237e-33	4.24728e-31
LCP1	12.5466	29.6534	1.2409	4.40544e-21	1.5973e-19
GAPT	0.0629448	0.308974	2.29533	1.12853e-20	3.90967e-19
OR2W3	0.118085	0.26953	1.19061	0.000263066	0.00135516
PARM1	1.78353	6.7358	1.91712	2.98747e-07	3.32237e-06
CYP4F3	8.01346	2.75027	-1.54285	3.80979e-05	0.000261102
TMEM176A	1.68951	6.50782	1.94557	5.98486e-29	4.52592e-27
P2RX1	0.137322	0.405303	1.56143	4.49367e-18	1.29562e-16
TRAF3IP3	0.299062	0.9128	1.60985	1.36204e-23	5.81457e-22
FMO2	1.11823	3.11559	1.47829	7.48184e-06	6.20004e-05
CYTH4	0.578875	2.73584	2.24066	8.56337e-36	4.51099e-33
SECTM1	5.45951	16.7942	1.62112	1.807e-20	6.16336e-19
IFIT2	3.74525	11.2199	1.58292	1.92242e-14	4.37135e-13
MMP12	14.8763	42.3595	1.50967	1.19786e-10	2.02977e-09
TBX21	0.0775166	0.547179	2.81943	1.72817e-30	1.65729e-28
LAG3	0.494636	4.20155	3.08648	3.88789e-32	5.35962e-30
CD1E	0.244851	0.905248	1.88641	9.1291e-13	1.8195e-11
BCL2A1	2.03053	6.67675	1.71729	8.15724e-18	2.32657e-16
ADAM28	0.500088	1.11009	1.15043	5.61917e-11	9.86261e-10
ALDH1A2	0.114265	0.248711	1.12209	0.00210339	0.00775599
BHLHE22	0.076443	0.273532	1.83926	1.41347e-13	2.99294e-12
CD300C	0.306492	1.27489	2.05645	2.49963e-28	1.71336e-26
IDO1	3.82895	19.4206	2.34257	3.8851e-28	2.60992e-26
HCLS1	4.20172	9.04259	1.10576	2.76288e-18	8.14343e-17
CDH8	0.392139	0.193309	-1.02046	6.29755e-05	0.000401451
PRDM13	0.391766	0.146022	-1.42381	2.20971e-06	2.07106e-05
BTN3A2	3.84115	8.17071	1.08892	1.74954e-17	4.92626e-16
AOC1	0.752956	1.52184	1.01518	3.31873e-07	3.65696e-06
MS4A6A	0.910472	4.87318	2.42018	6.946e-34	1.53206e-31
REEP1	2.0289	0.95031	-1.09423	0.0110818	0.0296936
SRGN	16.4937	55.5132	1.75092	1.42451e-26	8.23228e-25
DPEP2	0.257496	0.555164	1.10836	3.15384e-14	7.09829e-13
CLEC4E	0.186209	0.860858	2.20885	6.35779e-24	2.88147e-22
NEURL3	0.376693	0.882125	1.22759	1.47681e-07	1.73726e-06
CEACAM21	0.188999	0.70796	1.90529	9.67659e-26	5.08174e-24
CHRDL2	0.272126	0.753892	1.47009	4.7651e-06	4.14877e-05
CEACAM3	0.0757911	0.165376	1.12565	6.09788e-13	1.23205e-11
CCL4	1.05884	5.3025	2.32419	1.0706e-29	8.96725e-28
CD33	0.136852	0.344745	1.33292	2.08592e-22	8.19141e-21
PI16	0.373377	1.6553	2.14839	2.74271e-05	0.000195671
IL2RB	1.09534	5.71279	2.38282	1.26787e-30	1.28084e-28
RGL4	0.0760817	0.184749	1.27995	3.95399e-14	8.82414e-13
TNFRSF17	0.184543	1.47813	3.00175	1.40328e-15	3.45186e-14
STAP1	0.142553	0.529091	1.89201	1.87043e-17	5.24433e-16
PHACTR3	0.609457	0.23431	-1.37911	0.000200611	0.00107878
PEAK3	0.0558711	0.213305	1.93274	2.12228e-26	1.1901e-24
SPI1	2.68526	12.2383	2.18827	1.44014e-35	6.35294e-33
CCNJL	1.23464	2.50388	1.02007	6.01128e-09	8.57256e-08
PDE6G	0.221441	0.496218	1.16405	2.69646e-13	5.58449e-12
CD86	1.4594	4.04399	1.47041	9.5014e-26	5.00962e-24
PARVG	0.441003	1.20489	1.45005	8.65218e-29	6.32613e-27
GRAP2	0.14761	0.549489	1.8963	6.41042e-26	3.43463e-24
APOC1	5.40987	25.1373	2.21616	4.74425e-15	1.12117e-13
MZB1	1.58237	11.8117	2.90005	5.26053e-17	1.415e-15
C11orf21	0.0826594	0.202639	1.29366	2.26368e-27	1.41979e-25
TNFSF12	2.67121	5.6979	1.09294	3.51544e-19	1.087e-17
ALOX5AP	2.47917	8.65771	1.80413	8.70521e-30	7.43257e-28
STARD8	0.452538	0.93515	1.04716	5.79696e-13	1.17484e-11
RCSD1	0.657443	2.05108	1.64145	2.4301e-22	9.5148e-21
SLAMF1	0.124782	0.807751	2.6945	1.39073e-33	2.78863e-31
IL21R	0.167636	1.31226	2.96865	9.13914e-36	4.51099e-33
MOGAT2	0.030408	0.109146	1.84373	5.27482e-05	0.00034575
LAMP3	8.5611	18.136	1.08299	9.64577e-11	1.64712e-09
RSPO1	0.0520616	0.197421	1.92298	3.73787e-09	5.47806e-08
SAA1	35.7497	80.9297	1.17874	4.37388e-05	0.000292935
LILRB2	0.415796	2.33291	2.48819	1.7906e-34	4.3883e-32
OMD	0.868147	1.95441	1.17072	4.03806e-06	3.56027e-05
IGSF6	0.640122	3.00834	2.23255	4.92135e-32	6.5787e-30
AQP9	0.554194	1.83018	1.72352	1.78401e-08	2.39935e-07
CD72	0.244748	0.936042	1.93528	6.16773e-21	2.18245e-19
IL2RA	0.581245	2.76527	2.2502	1.61154e-30	1.56817e-28
RARRES2	6.3433	16.0545	1.33967	3.86921e-10	6.19916e-09
ZNF521	0.596029	1.25888	1.07869	1.71531e-07	1.99652e-06
ARMH1	0.121574	0.259753	1.0953	1.66382e-10	2.77667e-09
LAPTM5	11.9418	51.6667	2.11322	9.36739e-32	1.15858e-29
GPBAR1	0.0791772	0.257142	1.69941	5.09627e-26	2.77547e-24
CASKIN1	0.247026	0.11548	-1.09702	1.12821e-09	1.73903e-08
ART3	0.0789099	0.341133	2.11206	6.42178e-08	7.97989e-07
TNFRSF13B	0.0184095	0.204908	3.47646	2.84143e-20	9.61725e-19
IL17REL	0.0229985	0.69508	4.91757	4.00718e-05	0.000272793
EPHA3	0.340181	0.732683	1.10689	2.10842e-06	1.99021e-05
STAT1	38.2649	98.932	1.37042	2.84556e-19	8.86072e-18
LAT2	0.830471	2.11891	1.35132	4.5196e-27	2.76909e-25
HLA-DPB1	12.4964	79.0664	2.66155	1.92403e-36	2.26594e-33
LAIR1	0.409937	2.23404	2.44618	1.10381e-33	2.28248e-31
SAMHD1	7.82412	27.0089	1.78743	9.25895e-29	6.6234e-27
APOBEC3D	1.03832	2.34597	1.17593	3.36859e-11	6.01618e-10
PTPN7	1.11074	2.49816	1.16934	7.48967e-23	3.0219e-21
RIPOR3	0.505037	1.24392	1.30044	1.57246e-10	2.63084e-09
GIMAP4	2.04716	8.02413	1.97073	1.4521e-29	1.17896e-27
SLC35G1	3.1651	1.03071	-1.61861	3.22005e-08	4.17786e-07
TFF2	0.740777	0.244595	-1.59864	0.0101505	0.0277259
PEG3	0.0853891	0.215711	1.33697	0.00242528	0.00873371
KCTD14	0.813458	1.76245	1.11545	0.00207315	0.00766372
FCGBP	1.5806	5.52902	1.80655	3.67763e-06	3.27964e-05
LILRB5	0.127617	0.602032	2.23802	9.19482e-25	4.42488e-23
FCGR1B	0.0212136	0.129381	2.60857	3.30768e-27	2.03599e-25
CD163	1.27727	7.07678	2.47003	1.08959e-25	5.65478e-24
ADCYAP1	0.0904301	0.212192	1.23049	0.000143985	0.00081362
LBP	0.222642	0.825169	1.88996	0.0150038	0.0377488
ESPNL	0.747084	0.348091	-1.10181	0.00554426	0.0170397
HLA-DMB	1.38453	8.34218	2.59103	2.52431e-35	9.75265e-33
FATE1	0.0656729	0.24627	1.90687	2.32041e-07	2.62913e-06
FGR	0.893803	3.12208	1.80448	2.46088e-26	1.37415e-24
GALNT16	0.0640446	0.165683	1.37128	5.3357e-06	4.58226e-05
ASPN	9.08868	18.651	1.03711	1.27426e-06	1.24822e-05
KRT71	0.210237	0.0579034	-1.8603	0.000329842	0.00163918
UCHL1	36.3271	14.2926	-1.34577	0.000814052	0.00351604
SAMD11	0.315803	0.677381	1.10094	0.00570074	0.0174194
SLAMF8	1.53794	6.21904	2.0157	7.28468e-27	4.34259e-25
CLDN20	1.4584	0.474749	-1.61915	3.45602e-05	0.000239963
MSI1	2.47856	0.997084	-1.31371	0.00863978	0.0243067
CLEC4A	0.619614	2.41353	1.9617	1.63913e-31	1.93681e-29
GIMAP8	0.938528	2.14494	1.19246	5.70933e-15	1.3373e-13
TCL1A	0.199443	0.647687	1.69932	8.4007e-20	2.75868e-18
MGAT3	0.796734	2.30352	1.53167	0.00567065	0.0173435
TRIM22	5.39393	17.0223	1.65802	1.21427e-20	4.19573e-19
SIRPB1	0.0777577	0.299669	1.94631	2.58495e-15	6.23118e-14
CYP1B1	1.18091	4.00883	1.76328	3.11119e-06	2.81817e-05
CELF2	0.800348	2.05998	1.36393	1.72369e-17	4.86381e-16
FOXA2	0.761992	0.26726	-1.51153	0.00754345	0.0217922
PLA2G2D	0.0917063	1.38143	3.91299	3.04516e-18	8.95547e-17
ODC1	247.701	112.505	-1.13861	3.40613e-10	5.49046e-09
ARHGAP25	1.28316	2.93514	1.19373	1.29446e-19	4.15797e-18
SIGLEC7	0.135546	0.654419	2.27143	2.5481e-28	1.72931e-26
MYO1F	0.546865	2.50534	2.19575	1.24094e-36	1.82474e-33
ARHGAP20	0.0947522	0.26343	1.47519	3.98981e-11	7.10648e-10
ACSL5	2.56499	6.62172	1.36825	3.32812e-19	1.03148e-17
TNXB	0.281075	0.663596	1.23935	0.000221438	0.00117409
LILRA6	0.126836	0.500643	1.98082	1.24819e-23	5.38062e-22
IL19	0.119813	0.590417	2.30095	0.00163006	0.00628562
MAP1LC3C	0.0491497	0.184151	1.90563	4.48342e-14	9.922e-13
SIGLEC8	0.0371186	0.300129	3.01537	7.18342e-24	3.23352e-22
CNNM1	0.818565	0.395805	-1.04831	0.0023191	0.00843469
CD3D	1.27542	10.1939	2.99866	7.04358e-36	4.48727e-33
HLA-DRB1	51.62	341.315	2.7251	1.57022e-35	6.70331e-33
FAT4	0.174642	0.441663	1.33855	9.07537e-08	1.10592e-06
HLA-C	266.746	605.856	1.18351	1.65377e-19	5.27372e-18
RCOR2	3.04644	1.42882	-1.0923	2.80491e-08	3.668e-07
CALB2	10.1017	4.96185	-1.02565	0.00646751	0.0192556
SLC8A1	0.119387	0.338609	1.50397	5.98707e-20	1.98579e-18
CMPK2	2.08714	6.56657	1.65361	8.77394e-17	2.34574e-15
GNGT2	0.278737	1.10281	1.98421	1.72505e-32	2.62405e-30
BTN3A1	2.87607	6.6449	1.20815	9.05702e-21	3.15423e-19
SPIB	0.0623324	3.34588	5.74626	3.55365e-24	1.63295e-22
PLA2G2F	0.513632	1.04978	1.03128	0.000237763	0.00124764
SLC9A4	1.05555	0.209596	-2.33231	0.0182717	0.0442224
HLA-B	398.098	961.601	1.27232	2.21335e-19	6.92469e-18
CCL7	0.180529	0.74145	2.03812	1.2565e-11	2.31595e-10
COL4A4	0.201525	0.560741	1.47638	3.21662e-05	0.000225232
OSM	1.09269	3.05952	1.48542	2.10454e-12	4.07186e-11
LCK	1.1933	4.19288	1.81299	1.25913e-23	5.41019e-22
TNFSF8	0.0793747	0.49106	2.62915	7.02377e-29	5.25156e-27
CD8B2	0.238791	2.77227	3.53725	6.13447e-05	0.00039276
PCYT1B	0.833644	0.385717	-1.11189	0.000514289	0.00240668
PIANP	0.93282	0.332234	-1.4894	0.00144398	0.00566554
BCHE	2.49986	0.925426	-1.43366	0.00030929	0.00155396
SUCNR1	0.125091	0.505899	2.01587	5.8885e-23	2.3978e-21
CLECL1	0.0432907	0.269446	2.63787	3.29704e-27	2.03599e-25
STAT4	0.504047	1.35543	1.42712	9.14726e-19	2.77013e-17
GLI2	4.38699	1.46221	-1.58508	4.11427e-08	5.26069e-07
IL27	0.0346621	0.127494	1.879	1.04169e-20	3.61828e-19
ARHGEF6	0.713868	2.1884	1.61614	1.3605e-21	5.1296e-20
TMEM88B	0.672957	0.315508	-1.09284	0.000609079	0.00276236
ISG15	125.603	354.87	1.49842	5.73829e-09	8.20978e-08
FCGR3A	2.63824	16.2996	2.62719	1.33288e-30	1.33632e-28
TMEM119	2.03731	4.97305	1.28746	2.09574e-10	3.46255e-09
HKDC1	2.3331	0.857538	-1.44397	1.74855e-05	0.000132155
GYPC	1.18155	3.6348	1.6212	5.6824e-21	2.02698e-19
CD6	0.405289	1.95844	2.27268	7.77744e-29	5.75009e-27
SMCP	0.98579	0.347728	-1.50332	6.30055e-05	0.000401451
CORO1A	3.91855	13.0155	1.73184	1.01287e-25	5.29814e-24
GOLGA6L7	0.574534	0.213054	-1.43117	0.00638385	0.0191054
LST1	0.924013	3.95232	2.09671	5.8769e-33	1.06541e-30
C19orf38	0.411052	1.23986	1.59278	1.91306e-23	8.11454e-22
CILP	0.293138	0.891489	1.60464	0.000326775	0.00162699
TNFRSF1B	3.60928	14.5478	2.01102	3.1134e-33	5.88611e-31
CD5	0.475035	2.61886	2.46283	6.80968e-31	7.26769e-29
MSR1	0.545973	2.15257	1.97916	7.50618e-21	2.62796e-19
FCRL3	0.0220444	0.303797	3.78462	1.26765e-30	1.28084e-28
CLEC2L	1.56278	0.490304	-1.67237	0.00209312	0.00772673
ART1	0.0315964	0.0662824	1.06887	0.0102699	0.0279655
LAP3	16.8959	39.7654	1.23484	8.77608e-20	2.87482e-18
LPL	0.826307	1.94182	1.23266	0.000314021	0.00157177
SUSD2	1.09809	2.56735	1.22528	1.27294e-05	9.94454e-05
RAB42	0.678911	1.86488	1.45779	2.60438e-08	3.41589e-07
IFIT1	8.90678	19.6472	1.14135	9.24187e-10	1.4406e-08
SELP	0.546154	1.79784	1.71888	2.86668e-10	4.67788e-09
ATP8B4	0.0852554	0.235419	1.46537	1.67999e-20	5.75983e-19
CCR8	0.169165	0.832366	2.29878	5.19876e-21	1.86451e-19
CALHM6	2.031	7.73883	1.92992	7.78067e-24	3.45535e-22
C20orf141	0.0885006	0.278779	1.65536	9.37435e-06	7.59242e-05
APOBEC3A	8.00588	17.3601	1.11664	1.00352e-08	1.39502e-07
CD22	0.137729	0.609331	2.14539	4.2252e-14	9.39769e-13
USP18	3.40689	7.53385	1.14493	8.45671e-12	1.58074e-10
GPR149	0.473838	0.136954	-1.79071	0.00116056	0.00473309
SPNS3	0.110978	0.234572	1.07975	8.41611e-16	2.08575e-14
RNASE6	1.68252	8.5907	2.35215	3.7063e-36	3.26994e-33
CCL5	16.4541	55.7936	1.76165	5.8195e-25	2.85242e-23
COLEC12	1.0488	2.33178	1.15269	4.51367e-08	5.74364e-07
PAK3	0.0297751	0.145203	2.28589	4.16873e-10	6.66292e-09
MS4A7	0.707572	3.26952	2.20813	2.89087e-31	3.2699e-29
GPR82	0.0681873	0.271833	1.99514	4.24457e-23	1.74992e-21
NLRC4	0.206315	0.462418	1.16435	4.54165e-22	1.76259e-20
SIGLEC14	0.173969	1.03767	2.57645	2.33167e-23	9.76499e-22
MCEMP1	0.207897	0.438025	1.07515	0.00122419	0.00494389
TLR10	0.100644	0.452841	2.16975	8.83806e-17	2.35812e-15
TESPA1	0.0972885	0.519134	2.41577	8.53523e-30	7.33475e-28
FPR2	0.173984	0.490848	1.49632	6.49153e-11	1.13038e-09
DDX58	6.21947	15.7714	1.34245	4.97782e-15	1.17218e-13
CD1B	0.123259	0.543839	2.14149	1.52679e-15	3.74177e-14
BTN3A3	2.40339	5.81086	1.27368	6.2808e-20	2.078e-18
HLA-DQB1	6.66788	30.1276	2.17579	5.14756e-24	2.34099e-22
TMEM176B	5.17685	22.4513	2.11665	3.18805e-30	2.9097e-28
KIT	0.667469	1.40932	1.07823	9.17942e-07	9.22402e-06
CLEC4D	0.0405334	0.146643	1.85513	1.29525e-17	3.66268e-16
GZMB	1.40605	11.2114	2.99524	1.94771e-31	2.26106e-29
SIGLEC10	0.416124	2.64402	2.66765	2.09095e-31	2.40623e-29
CXCL12	2.72475	5.92249	1.12008	8.77753e-08	1.07657e-06
LILRA5	0.414382	1.57206	1.92362	7.51234e-24	3.34742e-22
IL3RA	2.2201	4.46706	1.0087	2.72767e-16	7.03665e-15
MARCO	1.28747	3.8443	1.57818	1.68834e-05	0.000128263
ITGAL	0.503672	3.41859	2.76285	4.05231e-35	1.41127e-32
TDRD10	0.251675	0.519852	1.04654	8.98916e-08	1.09847e-06
ANKRD44	0.269366	0.737869	1.4538	5.57174e-20	1.85267e-18
CCL13	1.49912	5.15983	1.7832	4.13475e-15	9.85934e-14
FLT3LG	0.442595	1.03518	1.22583	1.79004e-21	6.6357e-20
IRF4	0.208137	1.52313	2.87144	7.85319e-29	5.77384e-27
AIF1	3.22215	15.0194	2.22073	4.41581e-35	1.44072e-32
GPR25	0.0334764	0.449375	3.74671	2.90521e-25	1.46188e-23
IRF1	4.8885	15.9235	1.7037	1.04099e-25	5.42381e-24
RNF150	0.378705	0.82829	1.12906	3.58789e-05	0.00024769
CXCL11	1.26633	28.9088	4.51279	6.96154e-26	3.71488e-24
CD37	0.769032	4.05333	2.39799	6.89709e-32	8.77655e-30
WIPF1	2.30476	5.80921	1.33373	1.29446e-19	4.15797e-18
IKZF1	0.242348	1.61016	2.73205	9.18176e-33	1.57807e-30
TLR7	0.0627149	0.579923	3.20898	6.79677e-33	1.18353e-30
C3	10.5926	28.2767	1.41656	1.63323e-15	3.98787e-14
CR1	0.0276589	0.128357	2.21434	7.70318e-13	1.54695e-11
REM1	0.288721	0.81194	1.4917	3.3395e-09	4.91602e-08
PREX1	1.65146	4.6379	1.48973	8.24411e-22	3.14417e-20
NRROS	0.534267	1.56626	1.55169	2.88614e-20	9.74368e-19
GBP5	1.52619	14.2337	3.22131	2.56116e-24	1.18512e-22
PRG4	0.204581	0.518242	1.34095	4.78116e-05	0.000316847
IFNK	0.182017	0.73006	2.00394	0.0209139	0.0493448
PPP1R16B	0.421705	2.0329	2.26923	6.27281e-27	3.7563e-25
DPT	2.31705	8.82502	1.92931	7.8502e-13	1.57408e-11
CRYBB1	0.126235	0.263521	1.0618	1.01419e-16	2.69515e-15
CHIT1	0.547256	2.4511	2.16314	3.41147e-06	3.07125e-05
PRPH	0.239438	0.102681	-1.22149	0.000847501	0.00362443
HLA-DMA	5.53071	25.4895	2.20436	9.03873e-34	1.89871e-31
TYROBP	9.30033	44.4541	2.25696	7.07678e-35	1.99264e-32
IGFLR1	0.310831	0.839441	1.4333	5.06579e-21	1.83171e-19
COL19A1	0.0168012	0.160321	3.25432	0.00037597	0.00183331
IRF8	0.405207	2.96343	2.87053	5.19513e-36	4.0885e-33
IL4I1	1.00177	5.23717	2.38624	2.44114e-29	1.9116e-27
AC136428.1	0.112367	1.42444	3.6641	3.01239e-10	4.89753e-09
JSRP1	1.09762	2.4032	1.13058	1.29659e-06	1.26729e-05
GZMH	0.388288	5.74585	3.88732	1.71611e-32	2.62405e-30
GNG8	0.477362	1.58329	1.72977	8.76393e-11	1.51018e-09
TSPAN11	1.00976	2.32667	1.20426	1.36497e-10	2.30114e-09
UBASH3A	0.0806485	0.731842	3.18181	6.22352e-35	1.83027e-32
HBQ1	0.691982	0.206173	-1.74688	4.68585e-05	0.000311152
GABRP	3.28263	8.59676	1.38894	0.000240596	0.00126101
ST6GAL1	2.01727	4.79995	1.25061	4.29155e-09	6.22745e-08
MMP19	1.79032	3.6079	1.01094	4.59189e-09	6.63417e-08
CLEC9A	0.0460107	0.162171	1.81747	1.95366e-16	5.08951e-15
CD74	95.6438	642.02	2.74687	1.59709e-36	2.11359e-33
EOMES	0.224141	0.673797	1.58791	4.94377e-15	1.16624e-13
ACKR4	0.401358	1.30265	1.69849	4.11186e-10	6.57997e-09
FMO1	0.843581	1.80167	1.09473	1.0692e-05	8.53429e-05
LY6G6D	0.237685	0.0297095	-3.00006	0.0011055	0.0045379
XCR1	0.197612	0.449203	1.18469	1.20913e-07	1.4468e-06
SDS	0.971743	2.82872	1.5415	7.95448e-16	1.97504e-14
C1QB	12.0631	93.6975	2.95741	6.89222e-36	4.48727e-33
TMIGD2	0.0937543	0.530793	2.50119	5.1962e-22	2.00485e-20
FLT3	0.0428779	0.231988	2.43575	5.21988e-23	2.1387e-21
KLHL6	0.464045	1.02691	1.14598	5.47556e-13	1.11482e-11
IFNG	0.0565167	0.758549	3.74649	1.31196e-26	7.61514e-25
GBP2	6.34443	17.5429	1.46732	1.28403e-22	5.11834e-21
CYP4X1	1.36175	4.32112	1.66594	9.43529e-05	0.000566032
IL7	0.39854	0.940204	1.23825	3.11209e-14	7.01626e-13
EVI2A	0.609486	2.90498	2.25286	1.11779e-32	1.87251e-30
KLRD1	0.0348785	0.208949	2.58275	5.14328e-26	2.77822e-24
CXCL13	6.14183	21.2515	1.79082	8.98787e-20	2.93692e-18
GPR15	0.241125	1.15276	2.25724	5.63482e-11	9.87697e-10
SLC25A48	0.62096	0.267296	-1.21606	0.0109044	0.0293431
CD19	0.130974	0.846041	2.69145	8.95586e-15	2.07569e-13
CLEC2D	0.454006	1.10884	1.28827	6.62091e-14	1.44351e-12
PLA1A	0.289557	0.83233	1.52331	3.06556e-13	6.33901e-12
NKX1-2	1.32202	0.579812	-1.18909	0.000808988	0.00349992
WARS	27.6222	116.585	2.07748	2.59416e-16	6.71842e-15
TDRD6	0.0453445	0.131271	1.53355	7.97528e-18	2.27959e-16
PTGDS	3.66339	7.90685	1.10992	4.166e-13	8.561e-12
OLFML3	5.42892	12.1901	1.16697	2.32728e-11	4.22485e-10
CYP4Z1	0.0412428	0.146689	1.83054	0.00709628	0.0207357
CD53	2.79096	16.3545	2.55085	9.13914e-36	4.51099e-33
CXCR6	0.257283	2.04568	2.99115	6.31843e-36	4.48727e-33
GFRA2	0.0692022	0.224336	1.69677	3.35855e-17	9.27914e-16
C11orf87	0.544712	0.192709	-1.49907	0.000633015	0.00285178
CSF2RA	0.609918	2.0512	1.74978	6.22194e-29	4.67847e-27
RAB19	0.118001	0.295852	1.32607	2.51324e-07	2.83307e-06
SLCO2B1	0.651221	3.42938	2.39673	7.36111e-30	6.45145e-28
PLXNC1	0.749261	2.13454	1.51038	1.01135e-18	3.05576e-17
SASH3	0.947674	6.72229	2.82649	1.15051e-39	1.52259e-35
CASS4	0.115809	0.409694	1.8228	9.35303e-24	4.11223e-22
PKDCC	0.854822	2.52729	1.56389	0.0201076	0.0477746
CD28	0.131614	0.753394	2.51709	6.47414e-30	5.71192e-28
MRC1	1.28214	4.18703	1.70737	5.39723e-14	1.18847e-12
SLA	0.440624	2.36941	2.42691	2.57929e-35	9.75265e-33
PODN	1.31455	2.78082	1.08094	1.42315e-08	1.94165e-07
CHRNA6	0.0472077	0.188887	2.00043	1.03009e-12	2.0377e-11
SLC7A11	11.4878	4.65232	-1.30408	3.09572e-08	4.02443e-07
SH2D1A	0.143783	1.18435	3.04213	2.44868e-32	3.56108e-30
PRAM1	0.14366	0.529971	1.88326	2.90165e-23	1.20378e-21
