# Supplementary material for: P2RY14 Is a Potential Biomarker of Tumor Microenvironment Immunomodulation and Favorable Prognosis in Patients With Head and Neck Cancer
Source: Front Genet. 2021 Jul 8;12:670746. doi: 10.3389/fgene.2021.670746 (PMC8297391; doi:10.3389/fgene.2021.670746)
Supplement: Supplementary Table 4 — Clinicopathological characteristics statistics of HNSC patients from TCGA. [file Table_4.XLSX]

## Sheet: intersectGenes
Gene	logFC
NTRK1	1.37848
P2RY12	1.85593
CLEC3B	1.0542
ADAMDEC1	2.45406
F13A1	1.82832
TNN	1.57381
GPR34	1.75519
ATP10A	1.33792
CSF1R	1.86691
SIGLEC9	1.48981
CCL14	1.25321
ADA2	1.48343
TM6SF1	1.39074
DNAJC5B	1.71242
CCL2	1.26364
CYBB	2.14148
FPR3	1.98262
PTGER2	1.40661
C7	1.8903
CTSK	1.55698
C3AR1	1.82451
PDE1B	1.08725
CCR2	2.36086
C4A	1.48395
FNDC1	1.93198
HK3	1.88166
OLFML1	1.49326
ADRA2A	1.70283
COL6A6	1.56192
GPR183	1.49791
IQGAP2	1.38183
ZEB2	1.37337
CD80	1.54996
CCR4	2.00723
SIGLEC6	1.46536
FCAR	1.42735
CX3CR1	1.60967
RGS18	1.72505
PLA2G2A	2.66745
CLEC10A	1.91271
CCL24	1.34559
LILRA1	1.569
PTGFR	1.72661
TLR4	1.47038
LILRA4	2.47826
CCL23	1.39022
CD180	1.78077
VSIG4	2.06454
SELL	1.75418
GPR141	1.77591
NCKAP1L	1.92066
BST1	1.17104
APLNR	1.25129
SIGLEC12	1.88212
ITM2A	1.41537
HSD11B1	1.38384
CPXM1	1.50171
IGSF21	1.28527
LILRB4	2.09937
PRRX1	1.26966
RUNX1T1	1.42637
DNASE2B	2.2792
ANGPTL1	1.87757
EVI2B	1.79427
SIRPB2	1.10465
ABI3BP	1.63344
GPR174	2.32888
OLFML2B	1.55485
GPR84	1.4359
WISP2	1.9472
CD300E	1.384
CCR1	1.89662
RASGRP4	1.43924
PDGFRL	1.65826
C1QC	1.91459
OGN	2.12109
P2RY13	1.92699
ZNF366	1.39173
ABCA6	1.3854
RIPOR2	1.13959
SLC7A7	1.65101
PROK2	1.45604
HAND2	1.2333
ELN	1.40876
LILRB3	1.41432
FBLN5	1.31832
C5AR1	1.4294
JAML	2.72927
TIFAB	2.10069
AGTR1	2.04326
SEC14L6	1.09853
LCP2	1.61512
CMA1	1.84717
WDFY4	1.91721
RSPO3	1.58051
MS4A4A	1.82703
SMTNL1	1.80068
MFAP4	1.76039
FGF10	2.12144
FCGR3B	1.43251
TMEM273	1.32067
ACKR1	1.28215
AOAH	1.0529
CD209	2.05036
TIMD4	1.88977
PTGIS	2.0327
MS4A2	1.40312
FGL2	2.0555
C4B	1.53392
CCRL2	1.44243
GPRIN3	1.60955
LRRC15	2.07036
SFRP4	2.26472
SELE	1.4833
TACR1	1.22413
CMKLR1	1.72347
PLEK	1.81741
CADM3	1.43064
SPN	1.8853
CPA3	1.25595
ITGAX	1.36768
TMEM26	1.24605
COMP	1.83216
LYZ	2.0925
TLR8	2.40322
FCGR2B	1.56875
MPEG1	2.07888
SCIMP	1.98574
FOLR2	1.82813
SCT	1.34673
STAB1	1.39436
LRRC25	1.69149
PTPRC	2.0574
CXorf21	1.75412
CCL11	1.47974
CD84	2.16498
MNDA	1.82165
PIK3CG	1.9774
P2RY10	2.0525
ADH1B	2.05597
CSF3R	1.48948
KIAA1755	1.23325
TFEC	1.90308
CD300LB	1.64531
CTSS	1.66889
MGP	1.31029
CD14	1.54501
ATP6V0D2	1.38492
CLEC1A	1.30349
LILRA2	1.44186
CYSLTR1	1.37228
P2RY14	1.45748
FGF7	1.81733
PPP1R1A	2.21385
ABCA8	1.75193
ENPP2	1.51952
CD4	1.74599
TCTEX1D1	1.14899
PRKCB	1.57702
DKK2	1.38042
ITGB2	1.7475
CD163L1	1.44157
FLI1	1.19995
DHH	1.4554
CLEC5A	1.17963
KCNA3	2.31704
GFRA1	1.70884
CCL18	1.84511
SERPING1	1.37729
DOCK2	1.92204
ITGA9	1.09098
IL10	1.28965
LAX1	1.96028
LILRB1	1.91738
PIK3R5	1.42926
FCN1	1.99505
PILRA	1.5414
GIMAP6	1.46567
CLEC4G	1.66917
CHI3L1	1.52965
ACE	1.05155
IL10RA	1.8116
GGT5	1.18042
FCGR2A	1.48796
PTCRA	1.92123
MMRN1	1.51078
PECAM1	1.08458
CTSG	1.64513
FPR1	1.5361
EPYC	2.81337
PRELP	1.68581
PLA2G7	1.5758
SIGLEC1	2.07056
TMEM176A	1.57695
MMP12	1.44922
BHLHE22	1.53302
CD300C	1.67111
MS4A6A	1.78058
SRGN	1.38283
CHRDL2	1.71919
PI16	2.37317
STARD8	1.21164
RCSD1	1.34207
RSPO1	1.61419
LILRB2	1.83144
OMD	1.97621
IGSF6	1.63055
AQP9	1.79734
IL2RA	1.67419
RARRES2	1.54858
ZNF521	1.40004
LAPTM5	1.57762
EPHA3	1.47791
LAIR1	1.83389
PEG3	1.4917
LILRB5	1.77483
CD163	2.12631
ADCYAP1	1.26974
LBP	2.13343
FGR	1.42758
GALNT16	1.34018
ASPN	1.81083
SAMD11	1.06111
SLAMF8	1.62442
CLEC4A	1.48806
GIMAP8	1.10522
SIRPB1	1.61436
PLA2G2D	2.51887
SIGLEC7	1.80682
ARHGAP20	1.25384
TNXB	1.49803
LILRA6	1.5967
MAP1LC3C	1.60138
SIGLEC8	2.08216
FAT4	1.37868
SLC8A1	1.30055
CCL7	1.80175
OSM	1.48936
TNFSF8	1.88425
SUCNR1	1.61715
ARHGEF6	1.41021
FCGR3A	1.9281
TMEM119	1.67781
CILP	2.25524
MSR1	1.79098
ART1	1.81419
LPL	1.41257
SUSD2	1.56425
SELP	1.49687
CCR8	1.81339
COLEC12	1.62298
MS4A7	1.75407
SIGLEC14	1.88265
MCEMP1	1.17194
FPR2	1.59812
CD1B	1.64459
TMEM176B	1.64818
CLEC4D	1.44214
SIGLEC10	1.88955
CXCL12	1.49699
MARCO	1.31981
CCL13	1.56553
WIPF1	1.244
TLR7	2.37416
CR1	1.97021
PREX1	1.25195
NRROS	1.28106
PRG4	2.13159
DPT	1.95936
CHIT1	2.00676
IRF8	1.99172
AC136428.1	2.39315
TSPAN11	1.30943
MMP19	1.01213
FMO1	1.28305
C1QB	1.99463
EVI2A	1.70039
TDRD6	1.36946
OLFML3	1.58714
CD53	1.81152
GFRA2	1.5239
SLCO2B1	1.94984
PLXNC1	1.55955
CASS4	1.60605
CD28	1.81686
MRC1	1.81865
PODN	1.70903
GSTA3	-1.61327
NKX2-2	-1.15572
FOXH1	-1.34012
SLC8A2	-1.5162
BTBD16	-1.42077
SPDYC	-1.43687
DDC	-2.02245
PRDM13	-1.24111
SLC9A4	-1.95846
HBQ1	-1.71862
